# Supplementary material for: Comprehensive Real-Time RT-PCR Assays for the Detection of Fifteen Viruses Infecting Prunus spp
Source: Plants (Basel). 2020 Feb 19;9(2):273. doi: 10.3390/plants9020273 (PMC7076543; doi:10.3390/plants9020273)

**Figure S1.** Alignments of genomic regions present in different *Prunus*-infecting viruses and amplified by the real-time RT-PCR assays. Multiple virus isolates available in GenBank were employed for assay design; accession numbers listed on the left side of each alignment, in the case of ACLSV, CNRMV, CVA, PDV and PNRSV a subset of analyzed accessions is displayed only. Primers and probes included in the assays are highlighted in red color and located at the bottom of each alignment. Alignments generated with MUSCLE and Geneious programs.

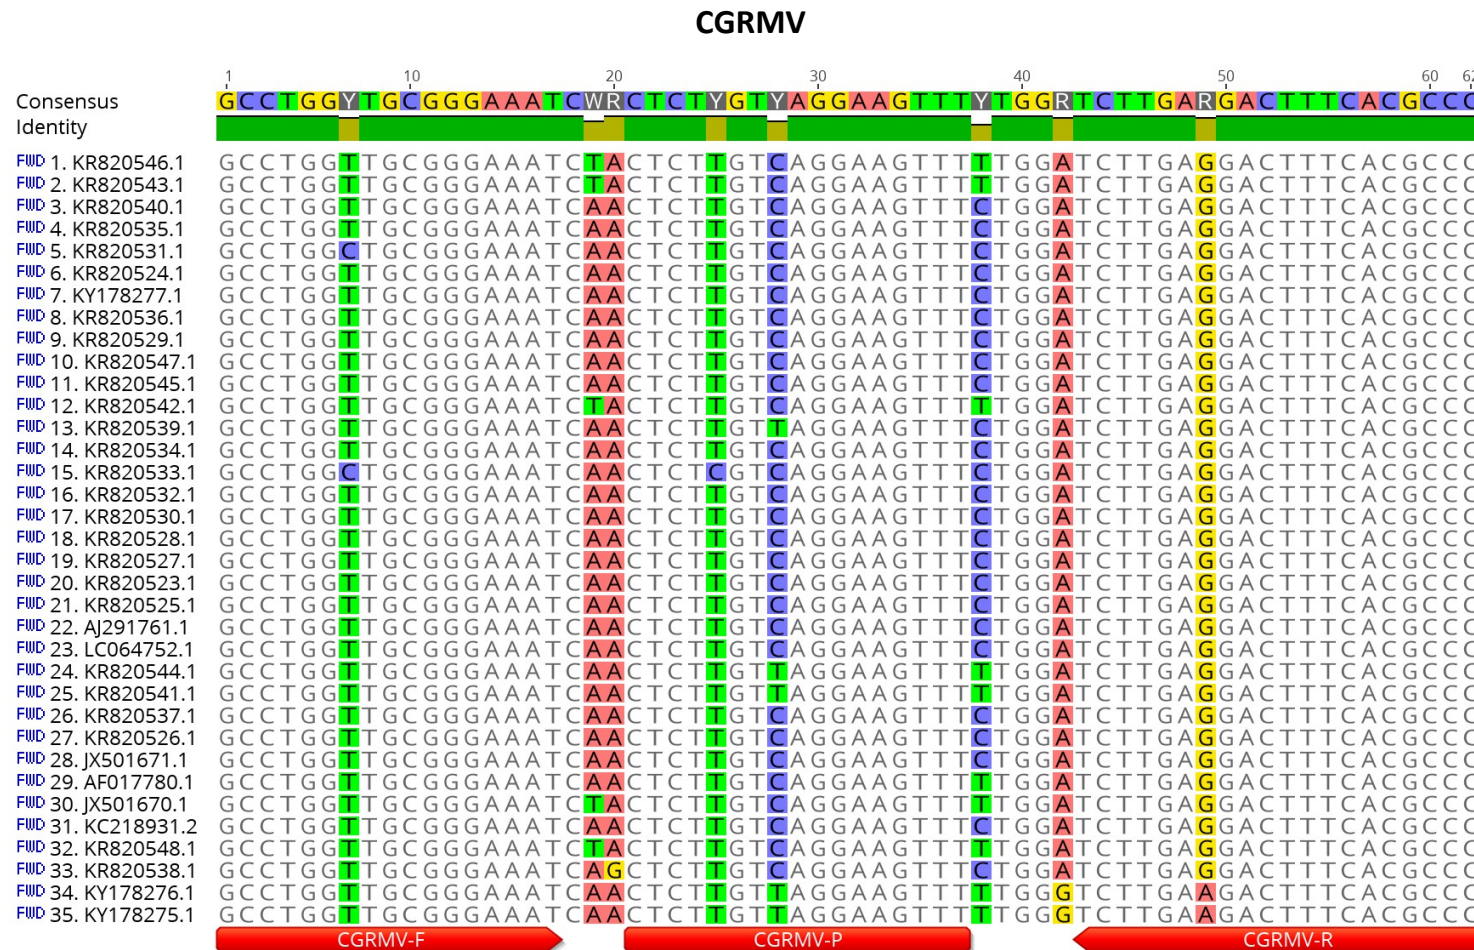

# ACLSV

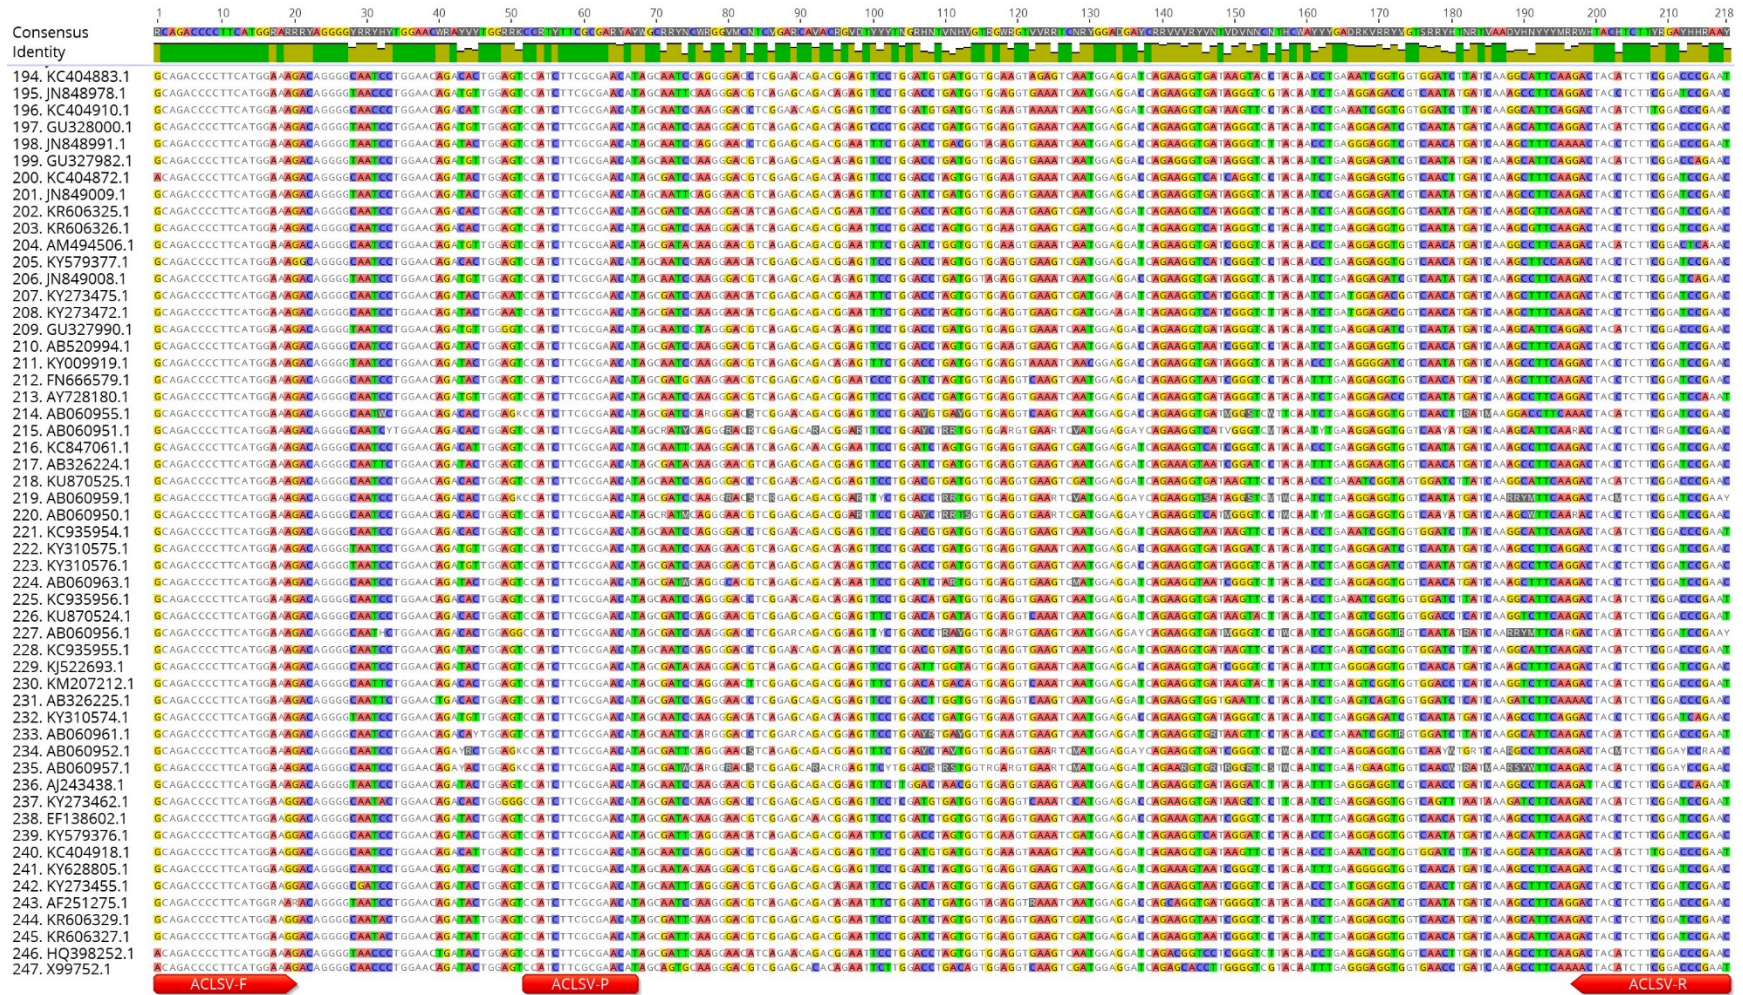

# CLRV

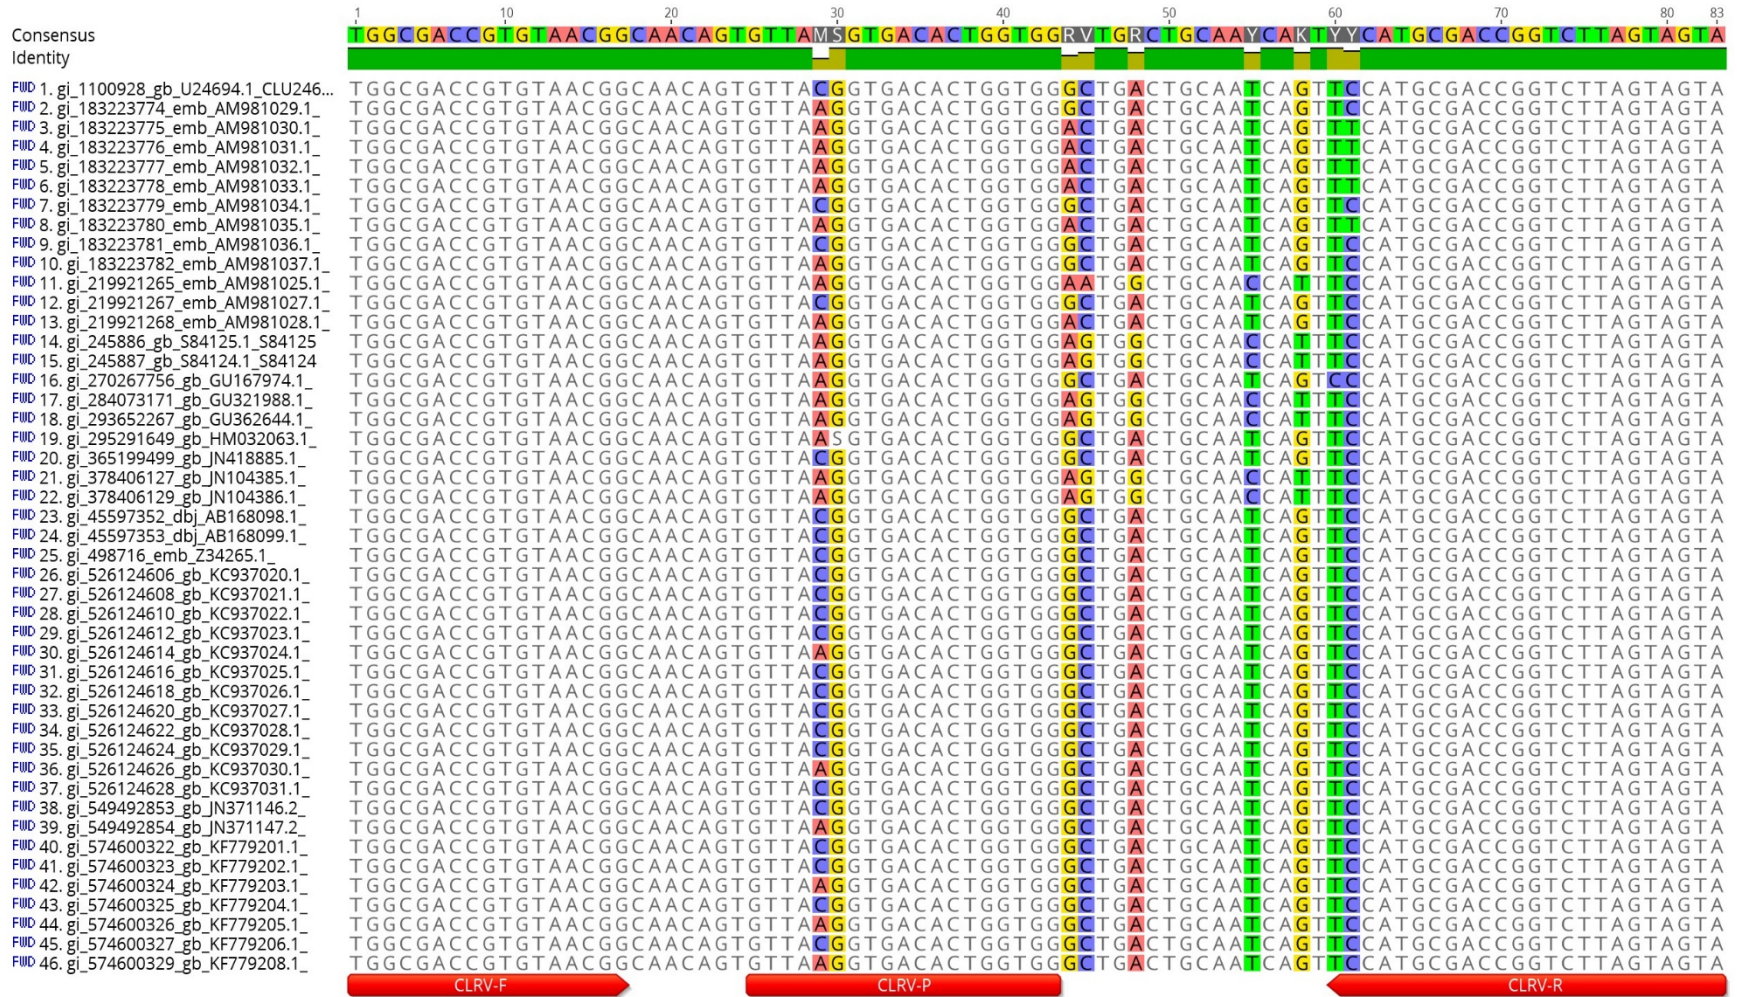

# CNRMV

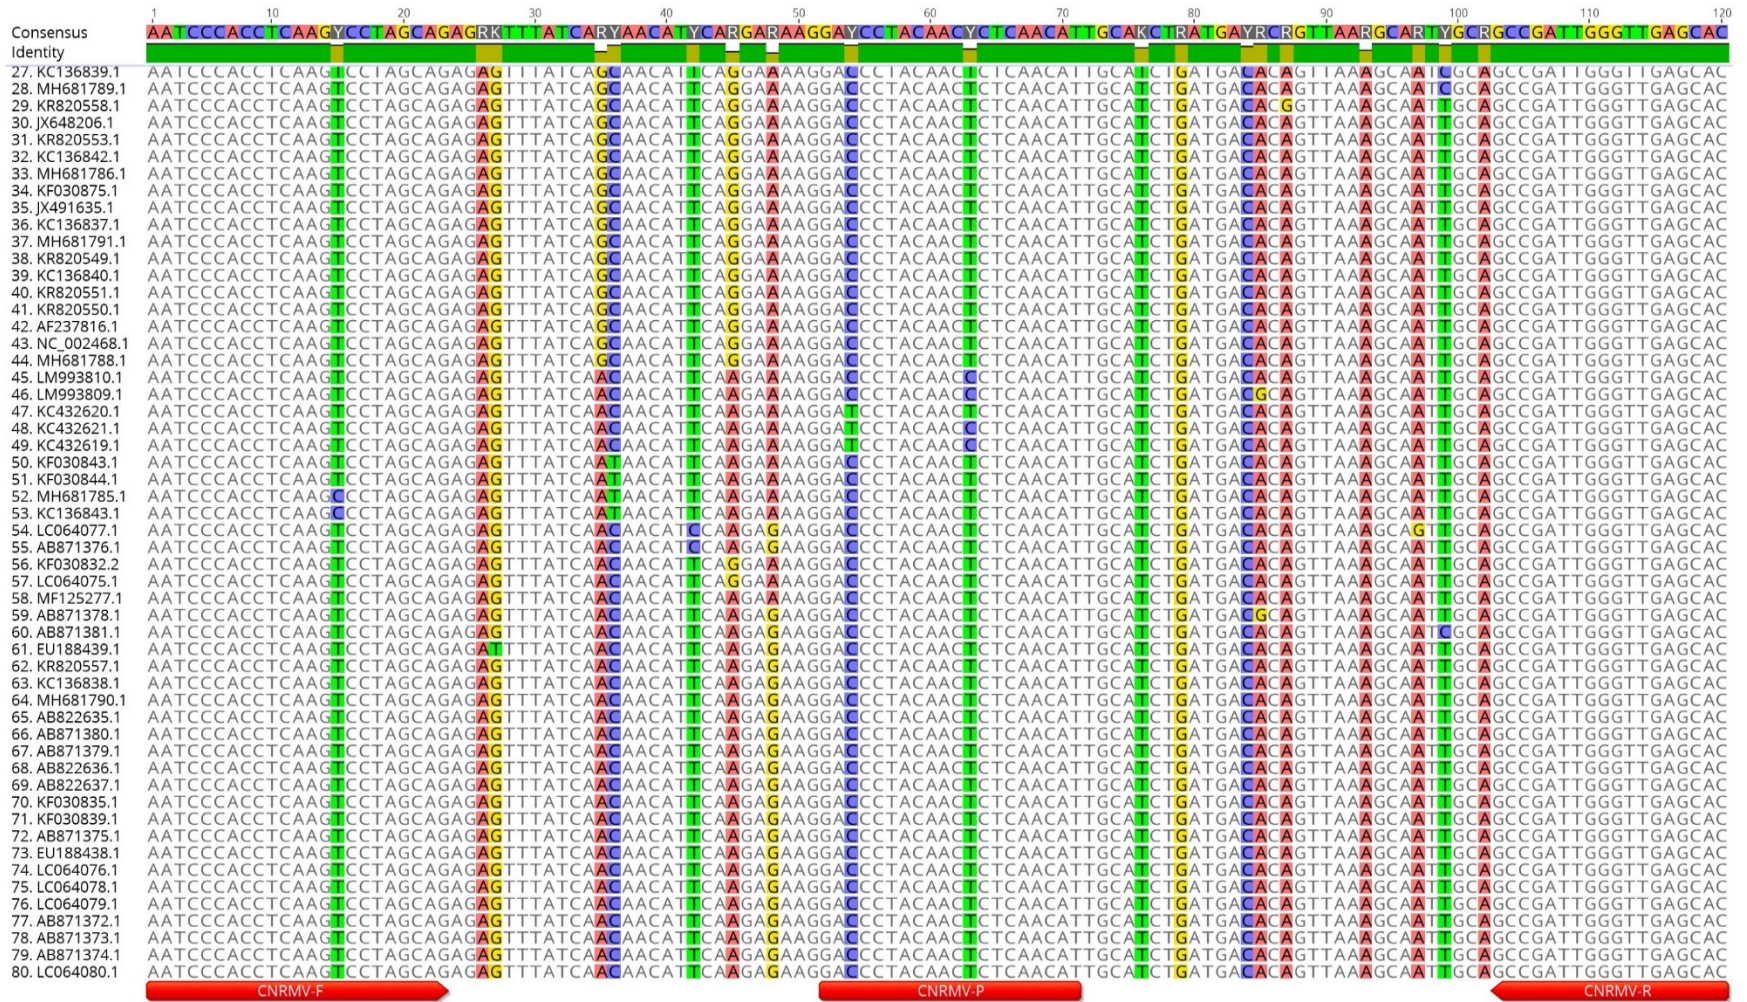

# CRLV

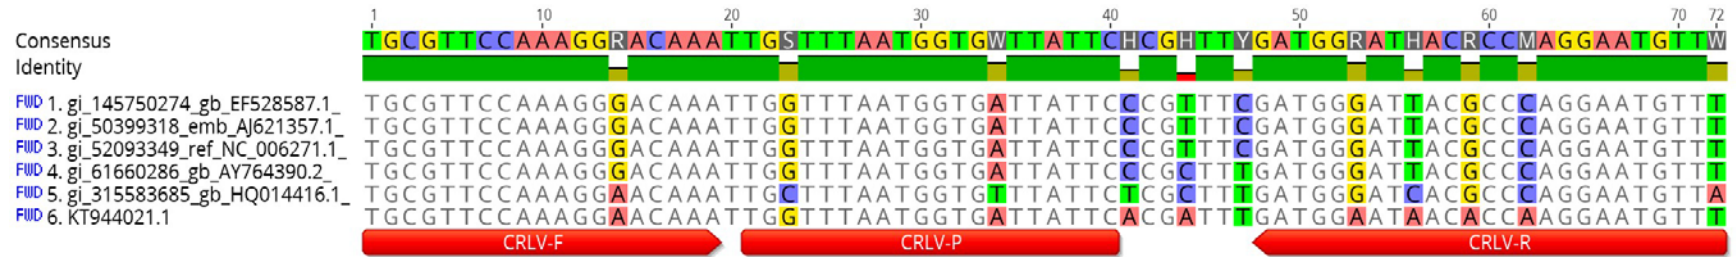

# CRMaV

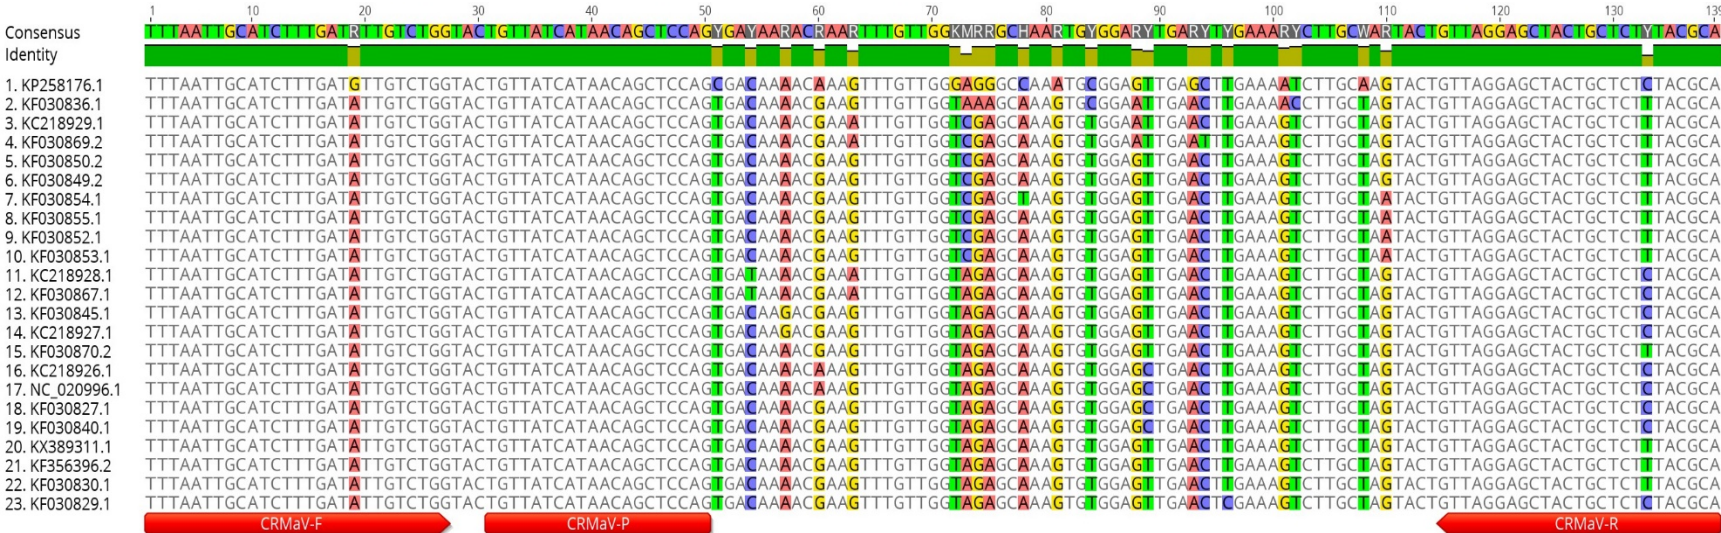

# CVA

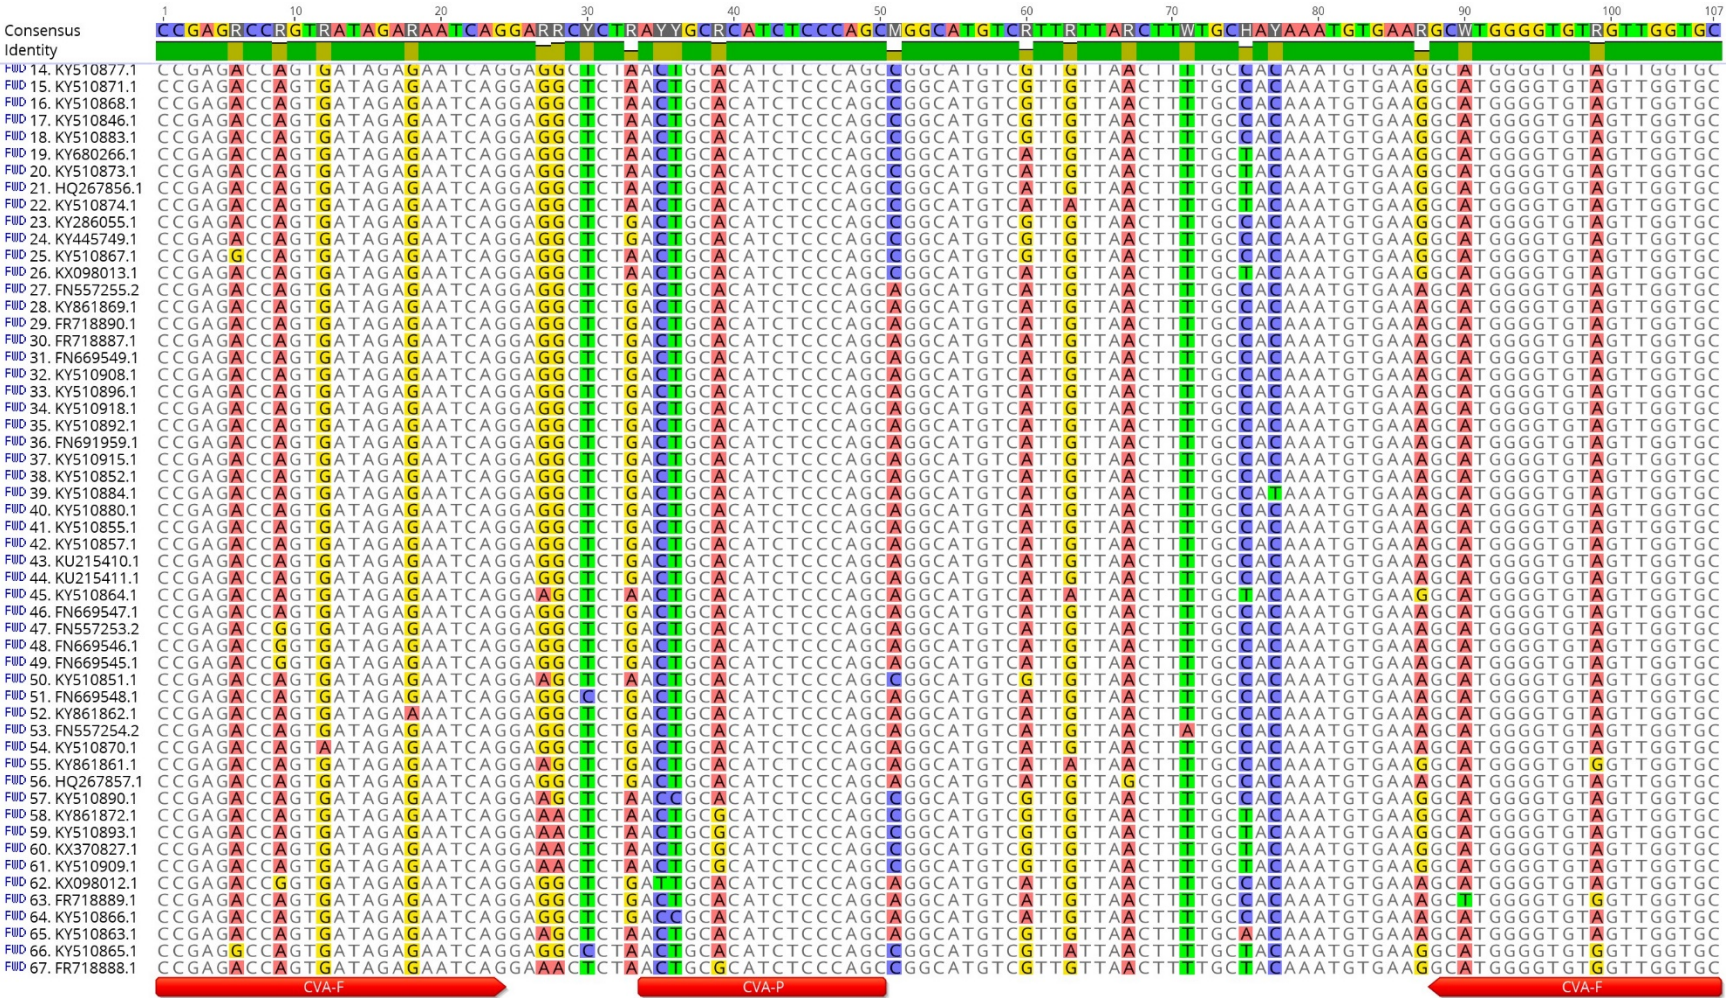

LChV-1

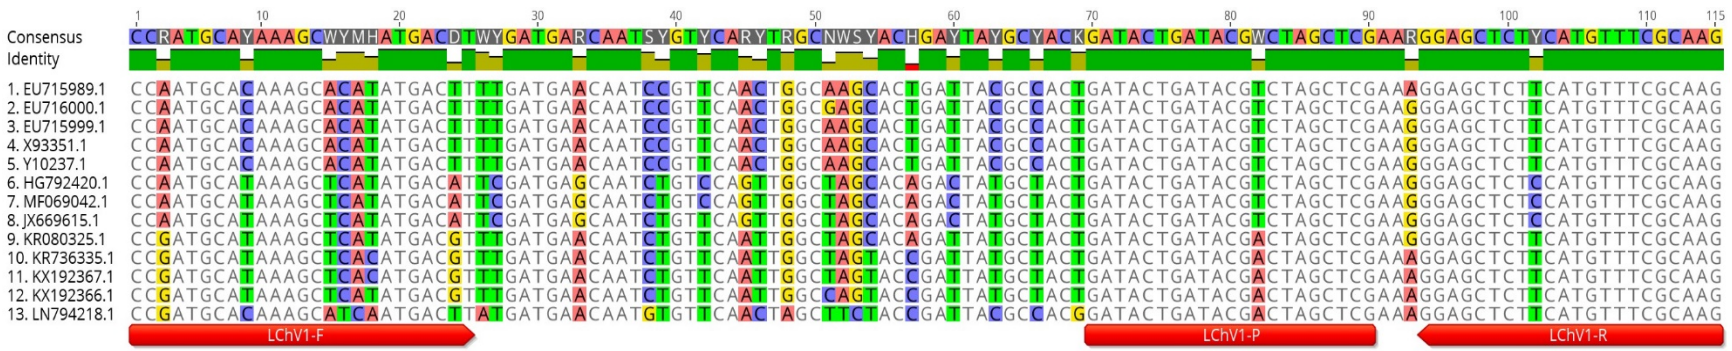

## LChV-2

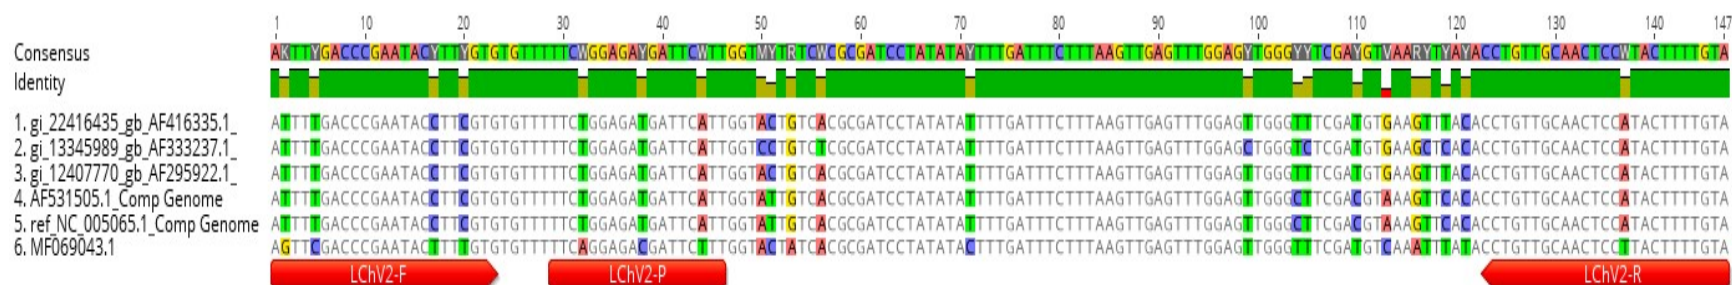

# NSPaV

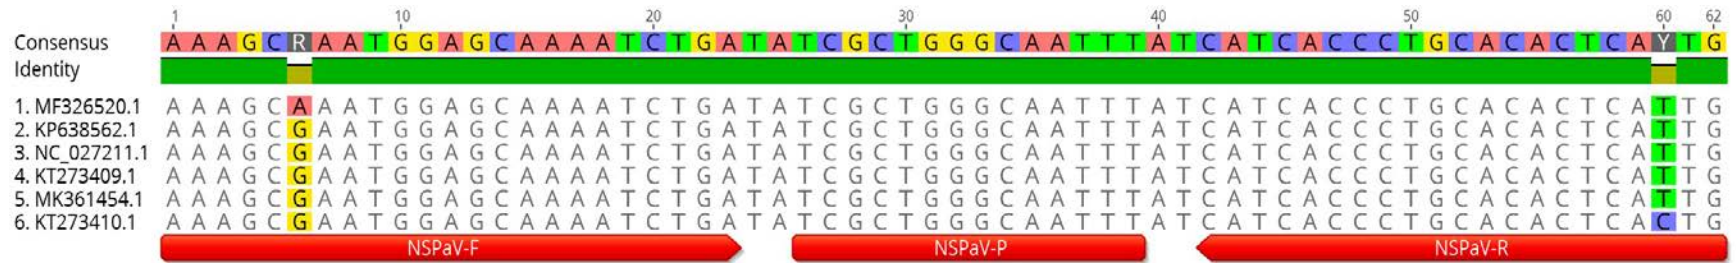

# NVM

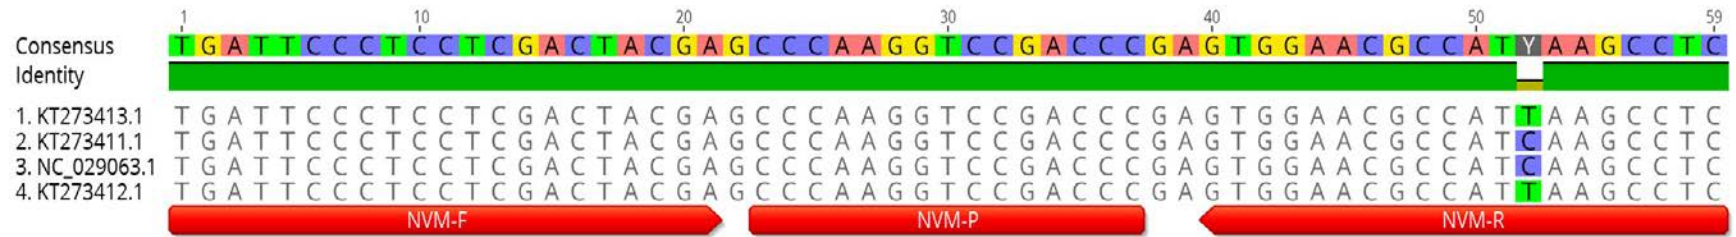

# PcMV

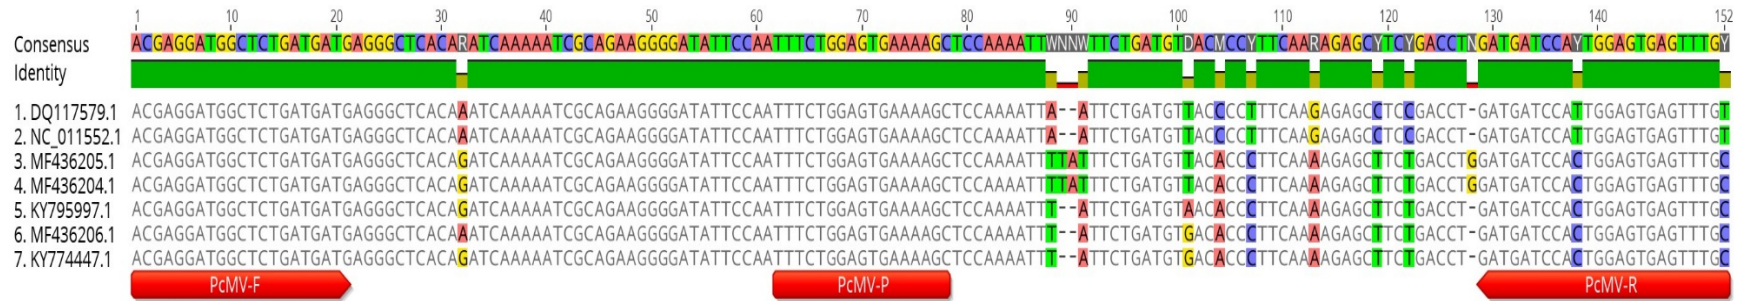

# PBNSPaV

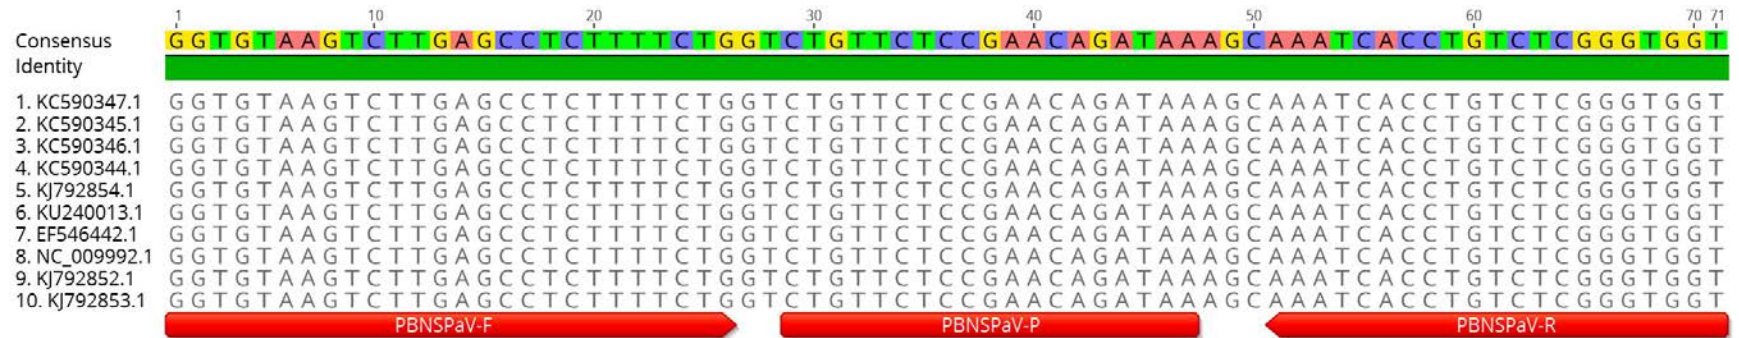

# PDV

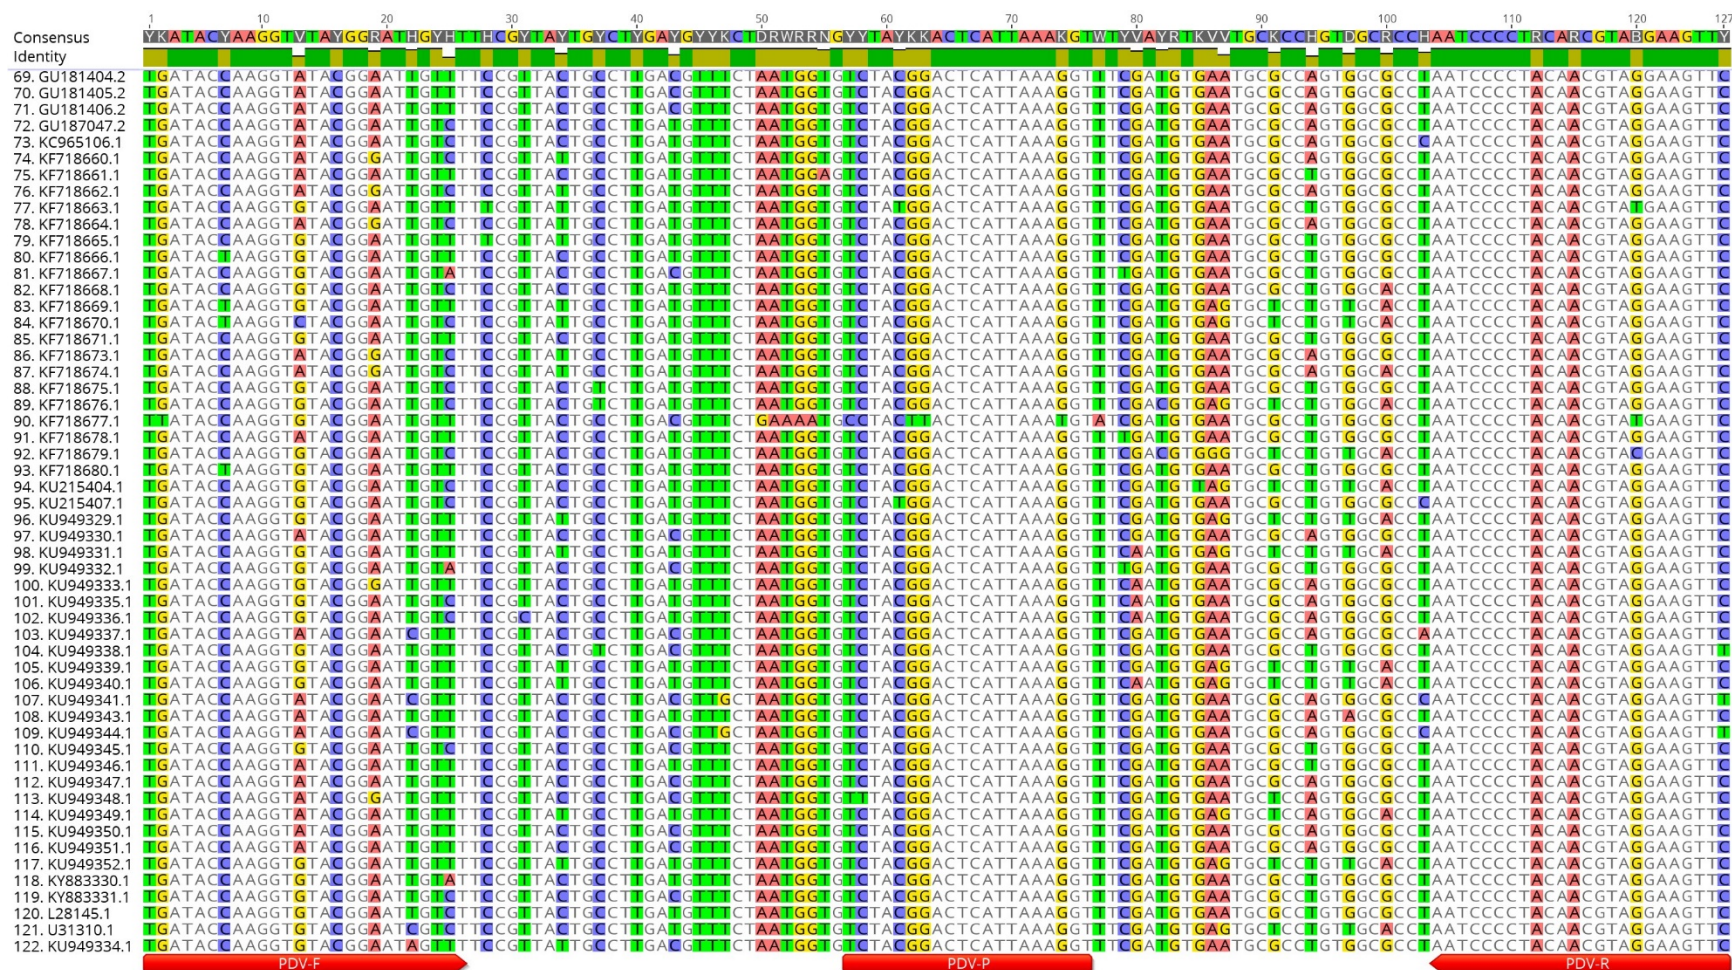

# PNRSV

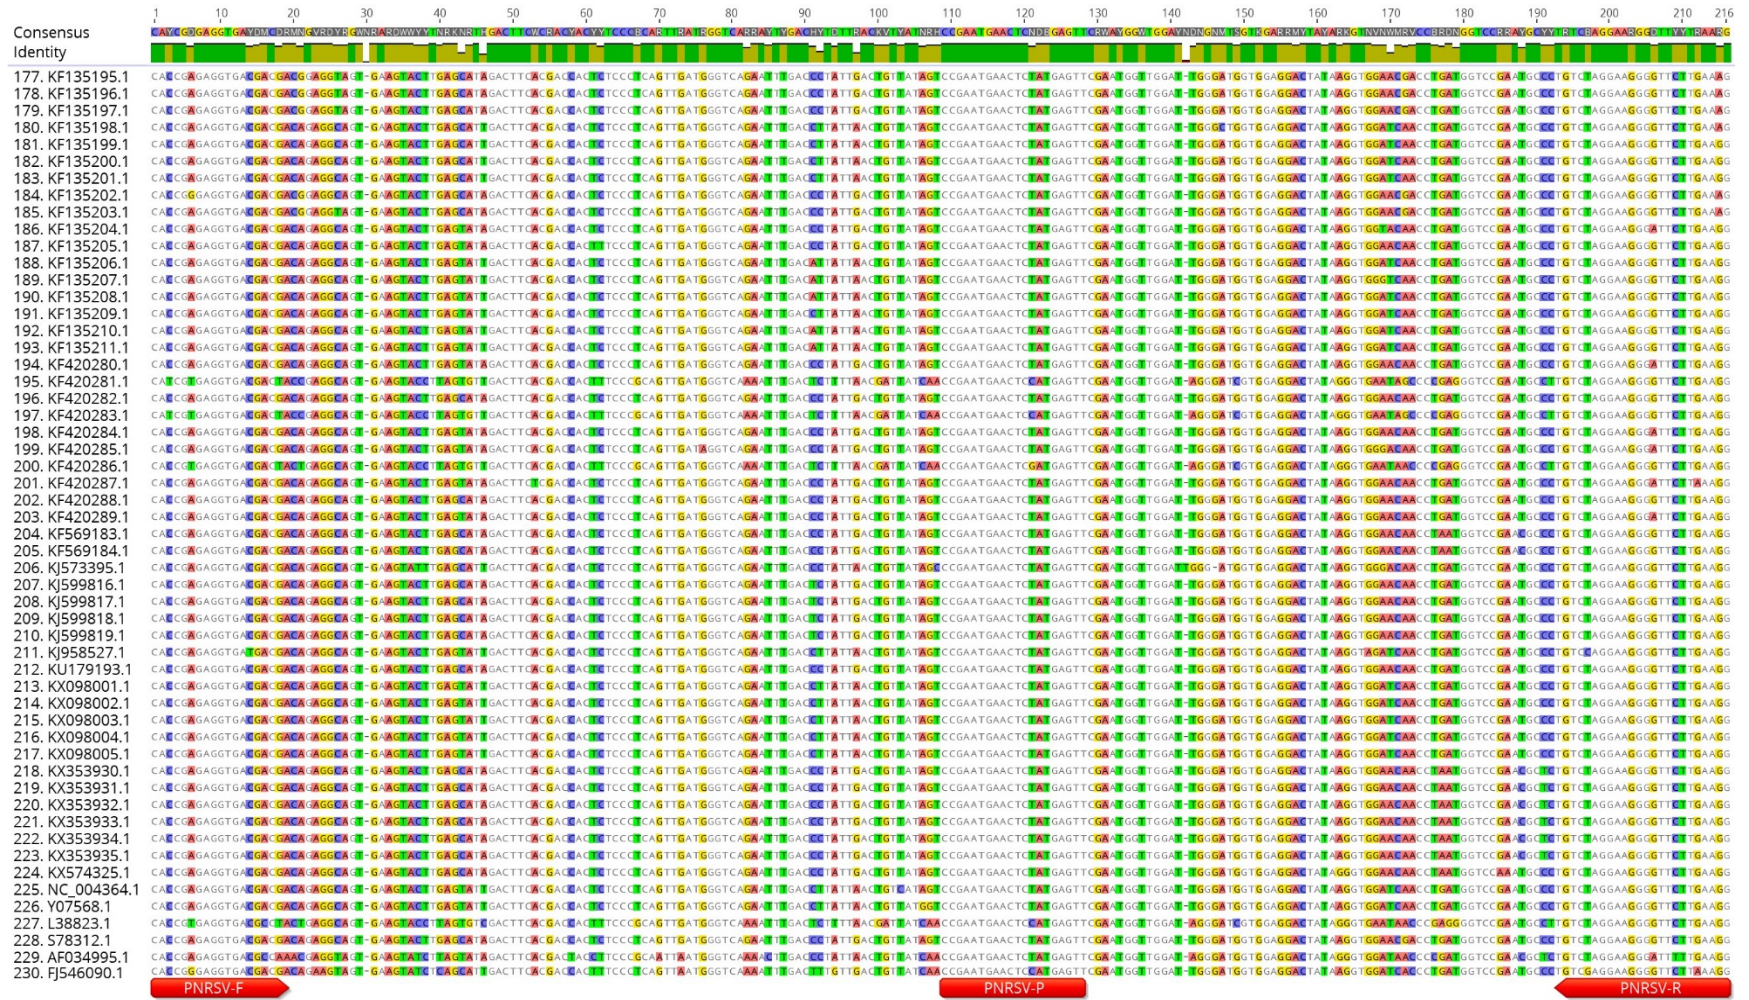

Supplement: Supplementary file 1 [file plants-09-00273-s001.zip › Figure S1.pdf]
