# Supplementary material for: Comprehensive Real-Time RT-PCR Assays for the Detection of Fifteen Viruses Infecting Prunus spp
Source: Plants (Basel). 2020 Feb 19;9(2):273. doi: 10.3390/plants9020273 (PMC7076543; doi:10.3390/plants9020273)
Supplement: Supplementary file 1 [file plants-09-00273-s001.zip › Figure S2.pdf]

**Figure S2.** Amplification plot and standard curve generated from new/updated real-time RT-PCR assays. In the plot, cycle threshold ( $C_T$ ) values obtained for three replicates of ten-fold serial dilutions of *Prunus* samples infected by different viruses. Eff%, amplification efficiency in percentage;  $R^2$ , coefficient of correlation.

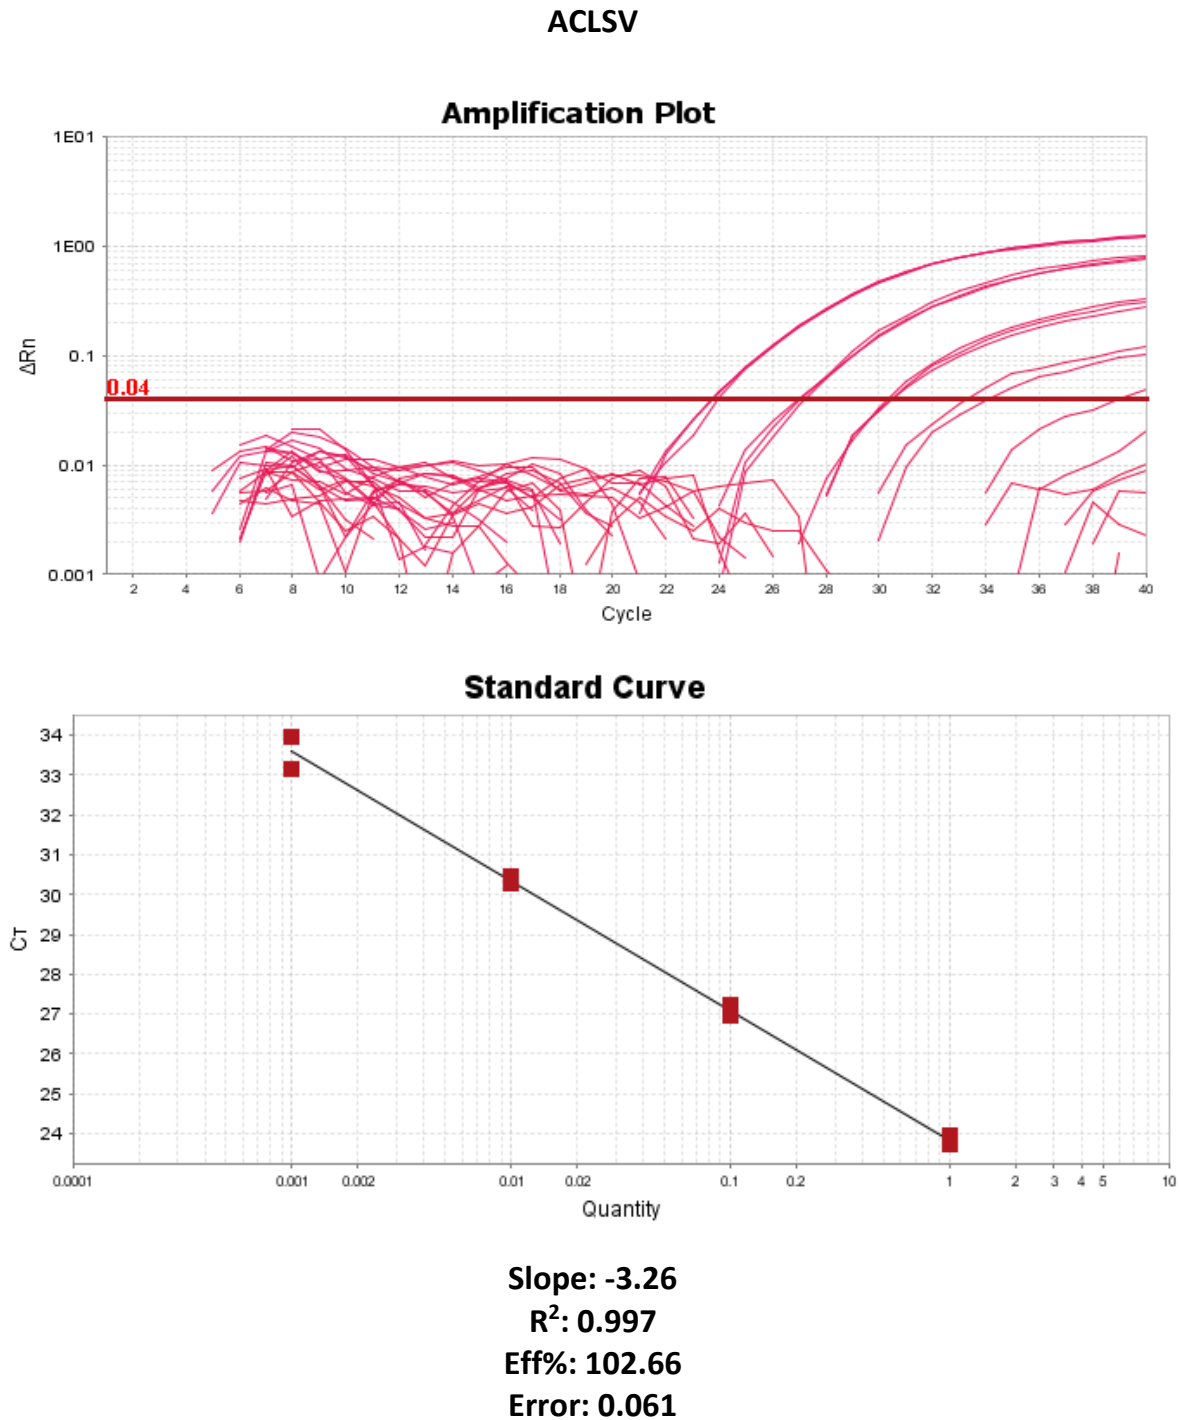

## CGRMV

### Amplification Plot

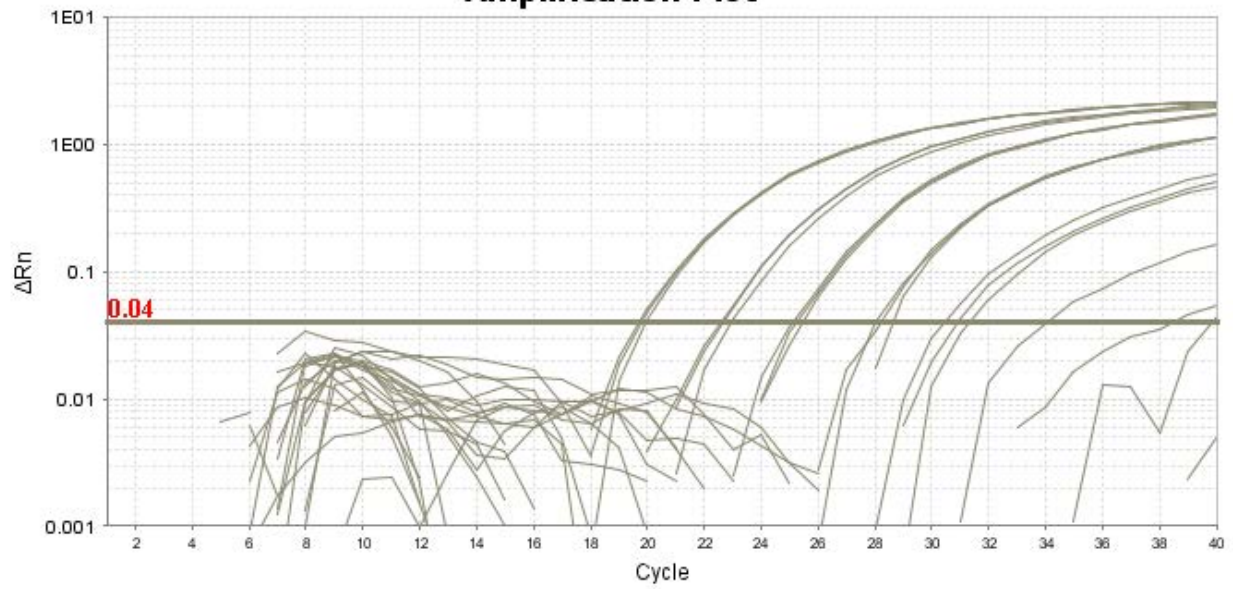

### Standard Curve

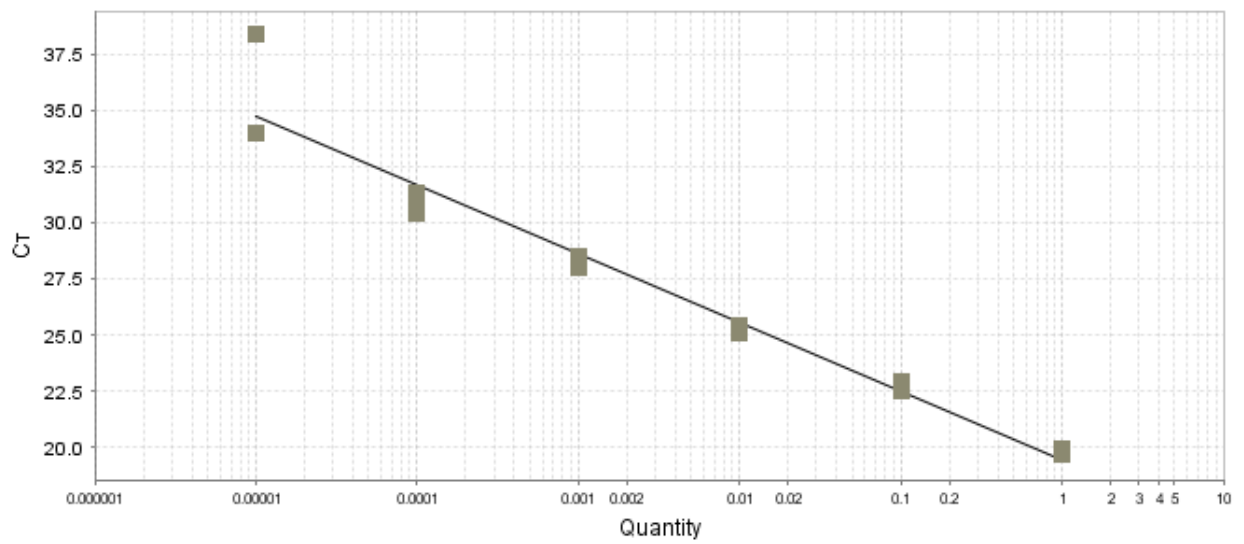

Slope: -3.056

$R^2$ : 0.959

Eff%: 112.44

Error: 0.163

## CLRV

### Amplification Plot

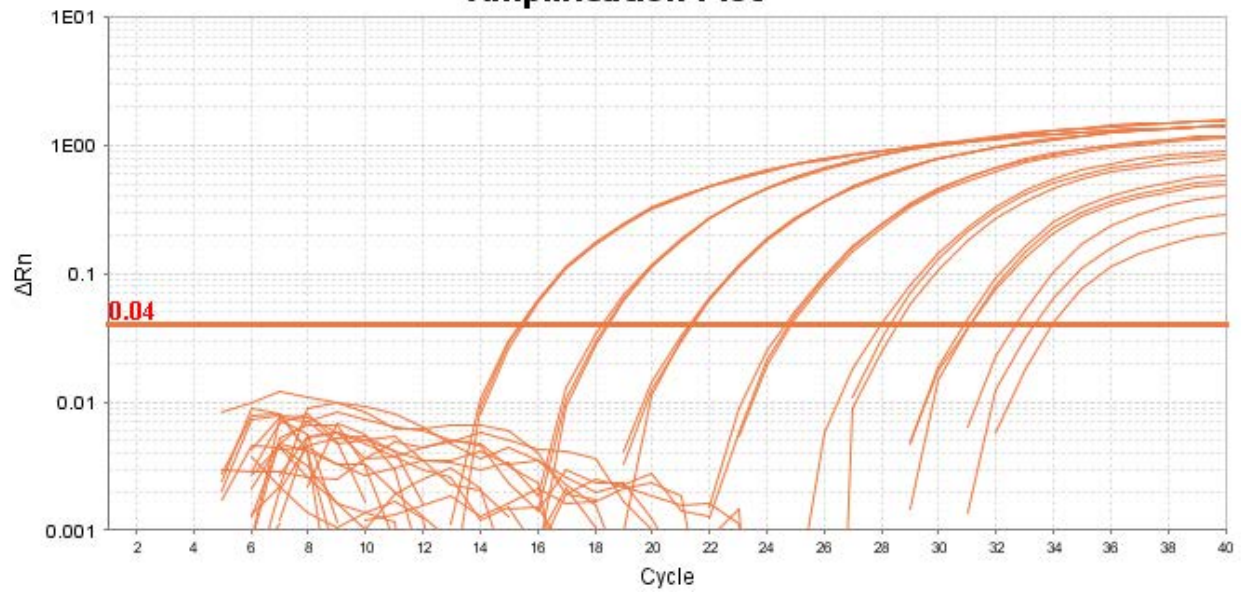

### Standard Curve

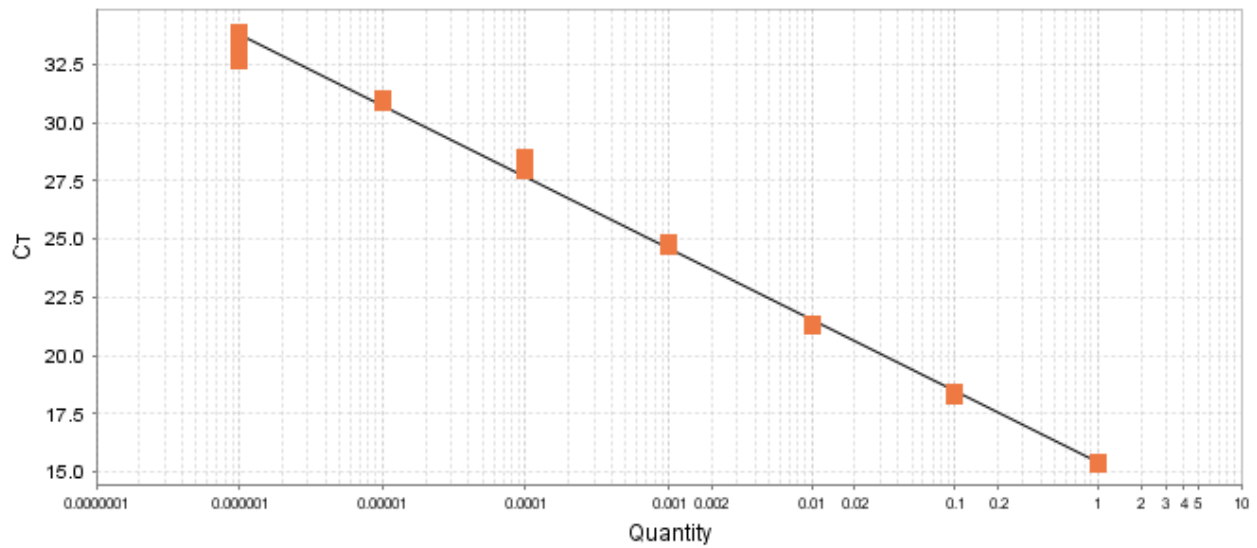

Slope: -3.065

$R^2$ : 0.996

Eff%: 111.955

Error: 0.046

## CNRMV

### Amplification Plot

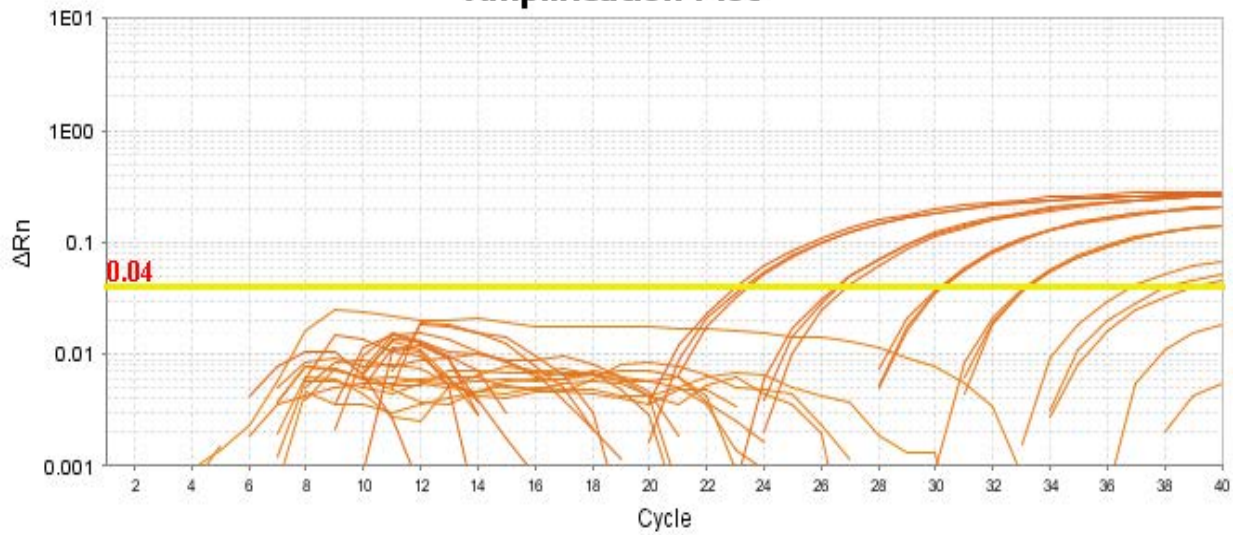

### Standard Curve

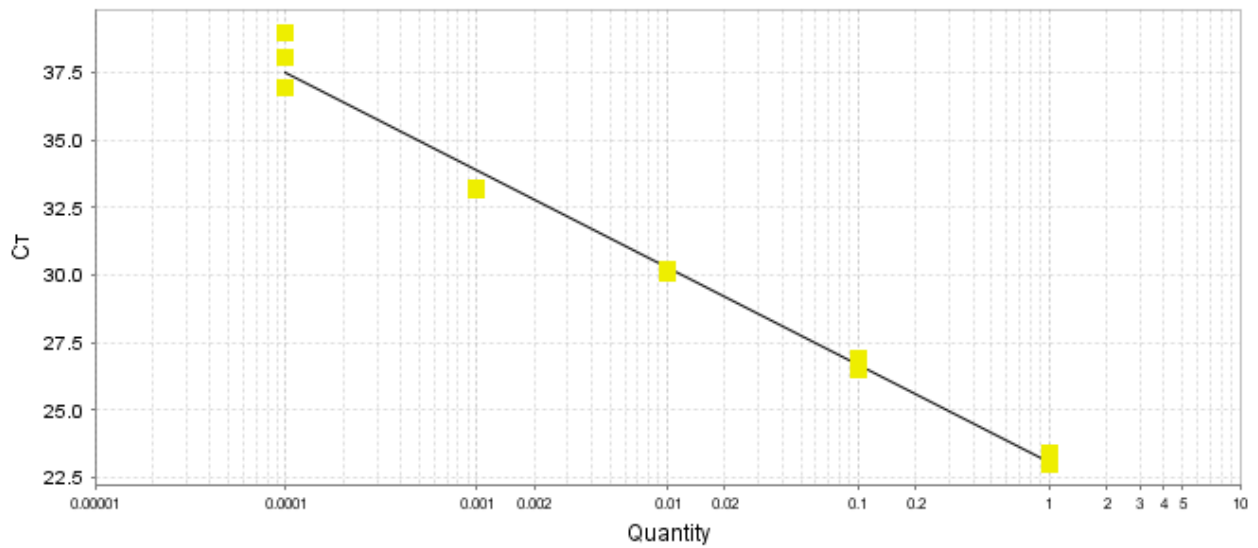

Slope: -3.608

$R^2$ : 0.988

Eff%: 89.322

Error: 0.11

CRLV

### Amplification Plot

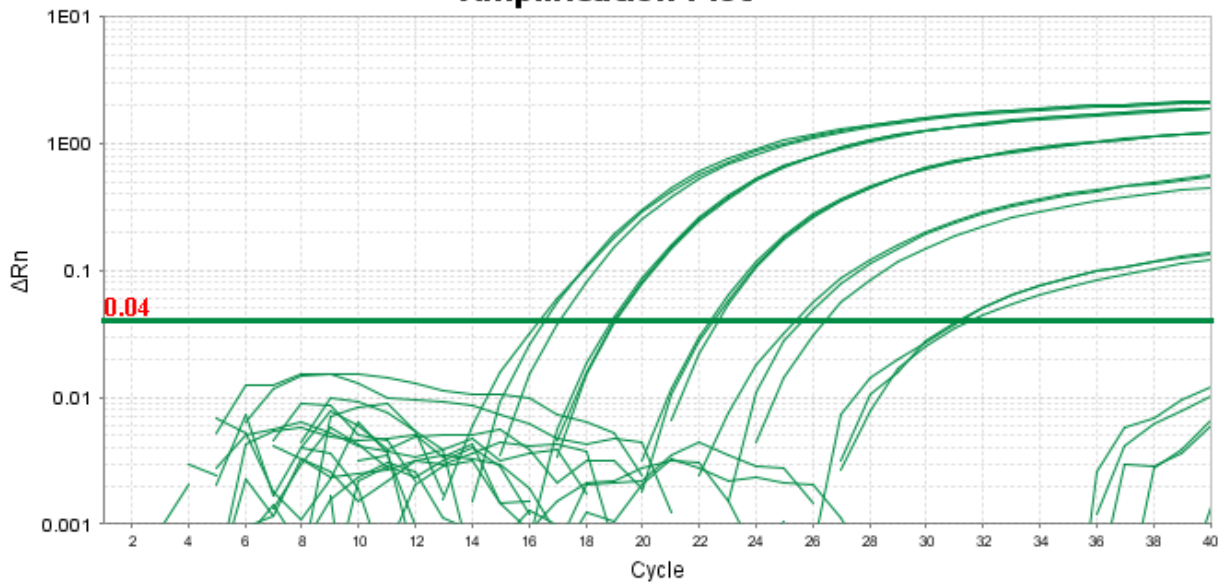

### Standard Curve

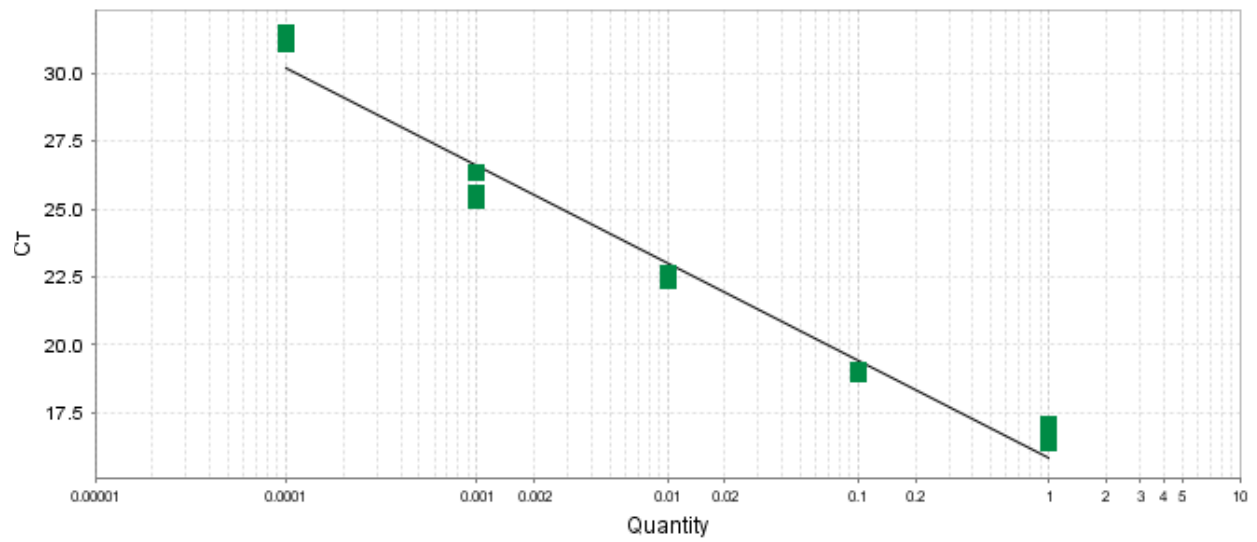

Slope: -3.597

$R^2$ : 0.975

Eff%: 89.685

Error: 0.16

## CRMaV

### Amplification Plot

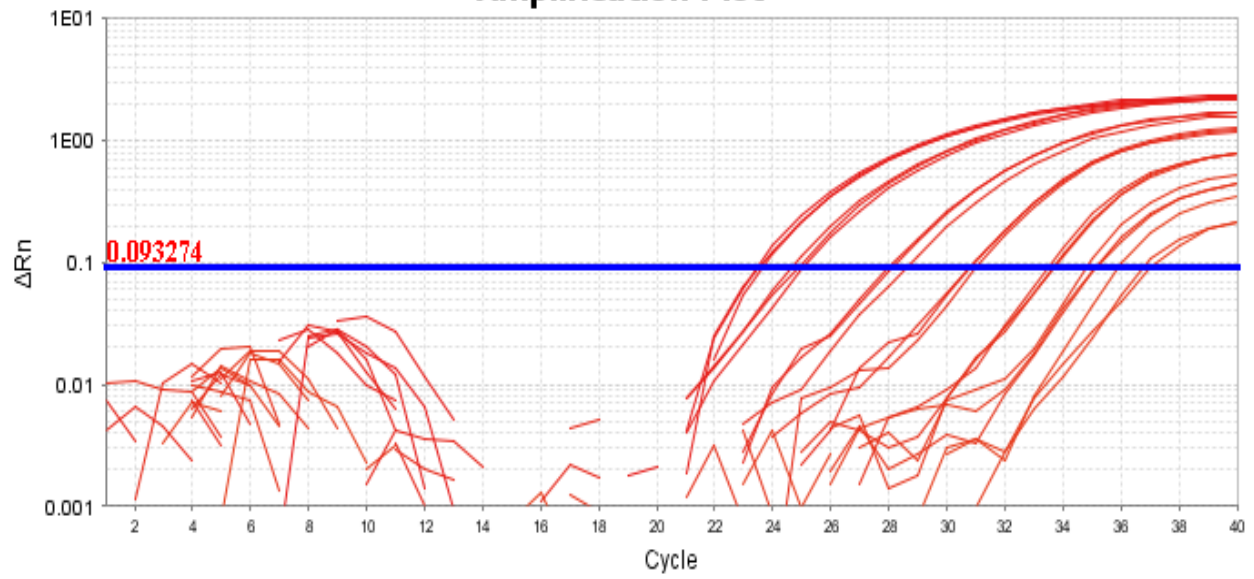

### Standard Curve

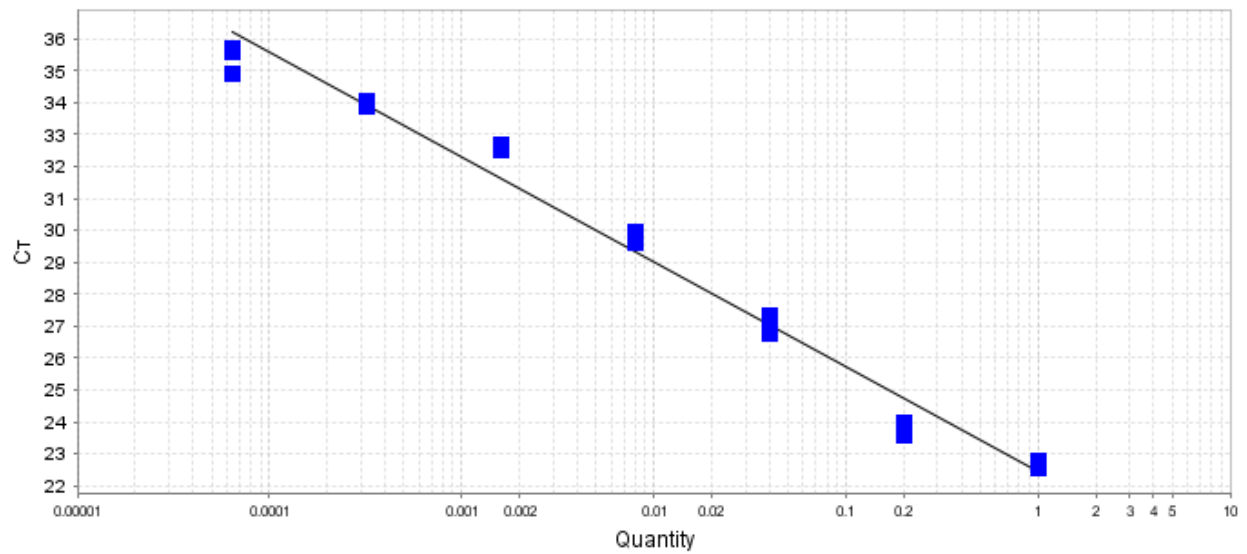

Slope: -3.285

$R^2$ : 0.98

Eff%: 101.564

Error: 0.108

CVA

### Amplification Plot

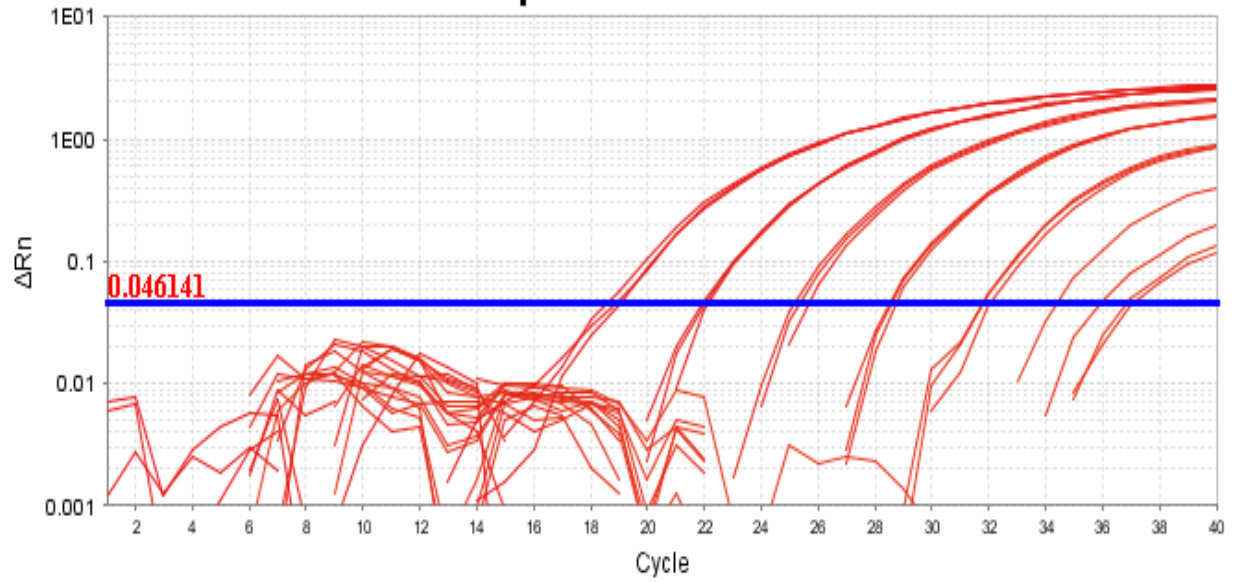

### Standard Curve

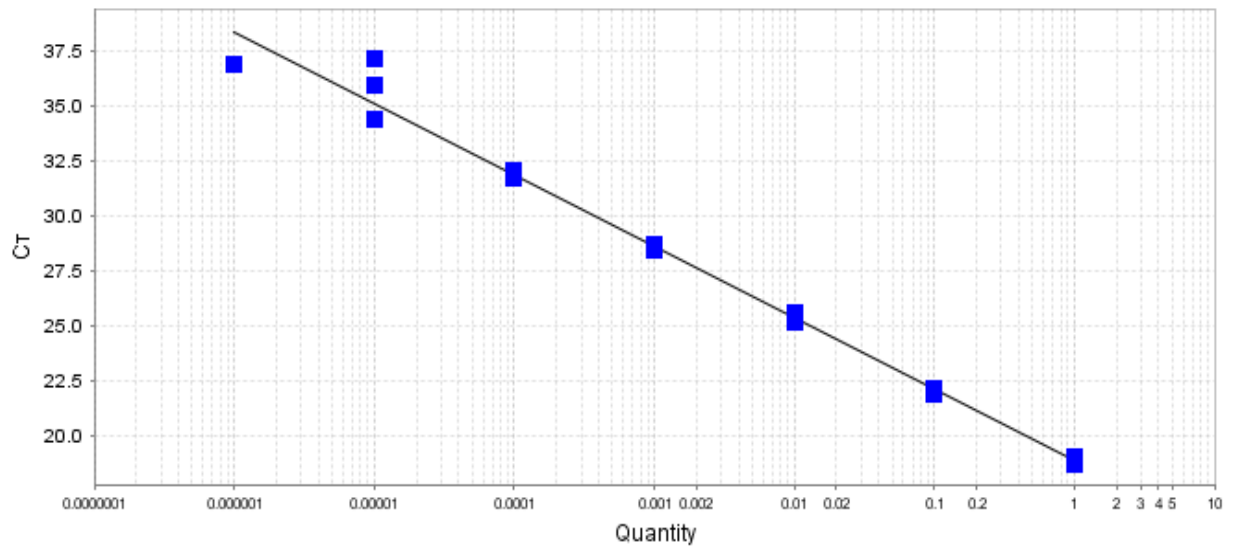

Slope: -3.253

$R^2$ : 0.989

Eff%: 102.946

Error: 0.085

## LChV-1

### Amplification Plot

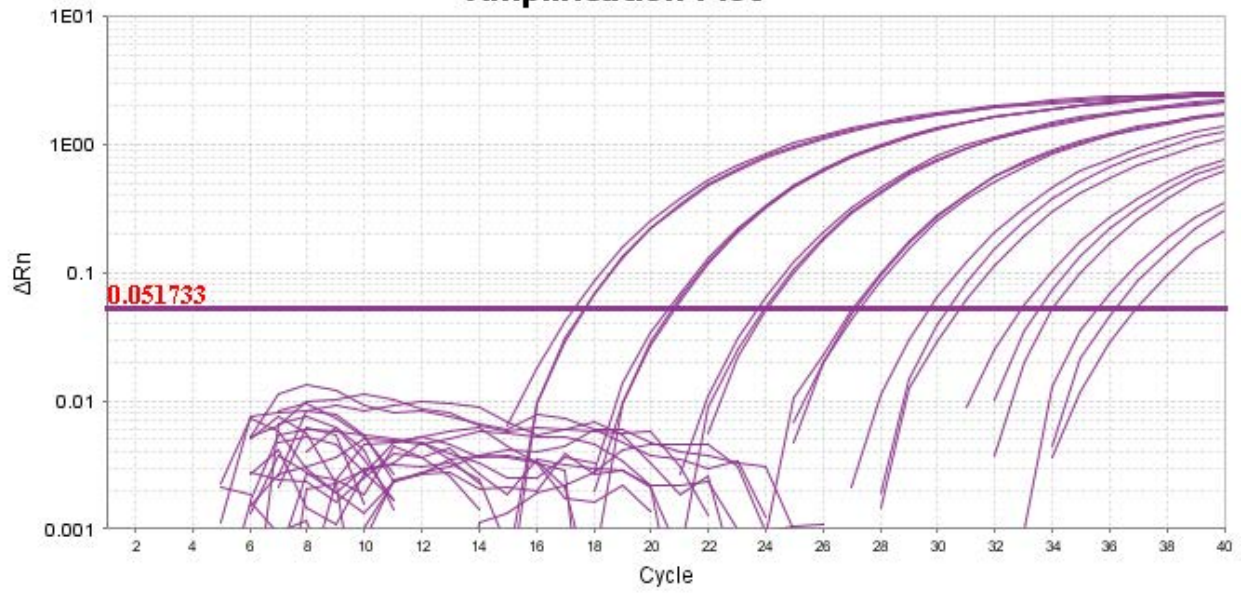

### Standard Curve

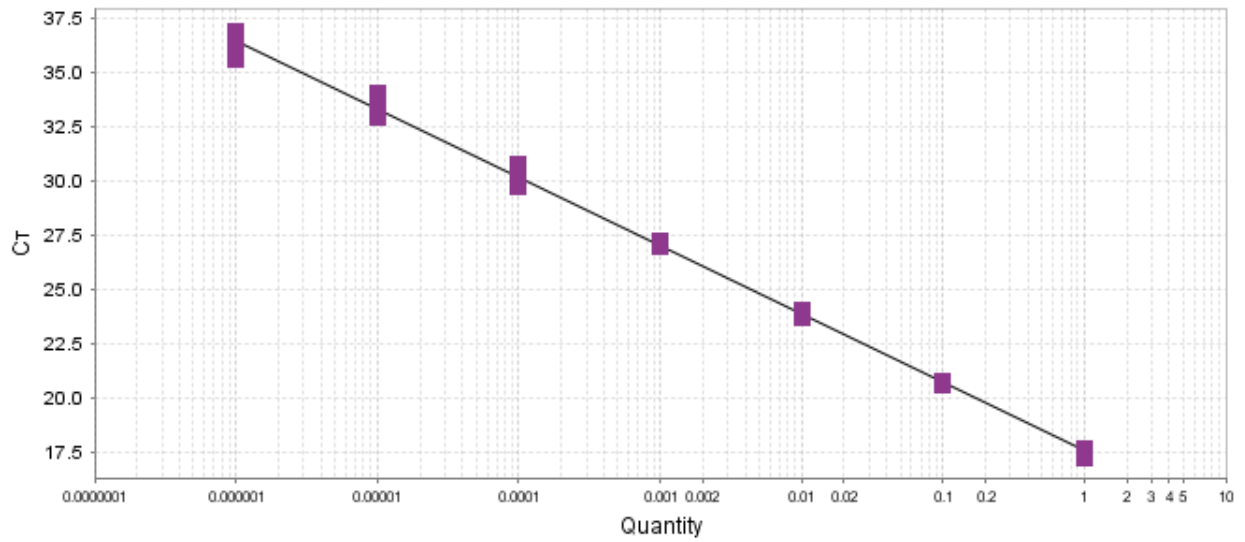

Slope: -3.145

$R^2$ : 0.997

Eff%: 107.948

Error: 0.04

## LChV-2

### Amplification Plot

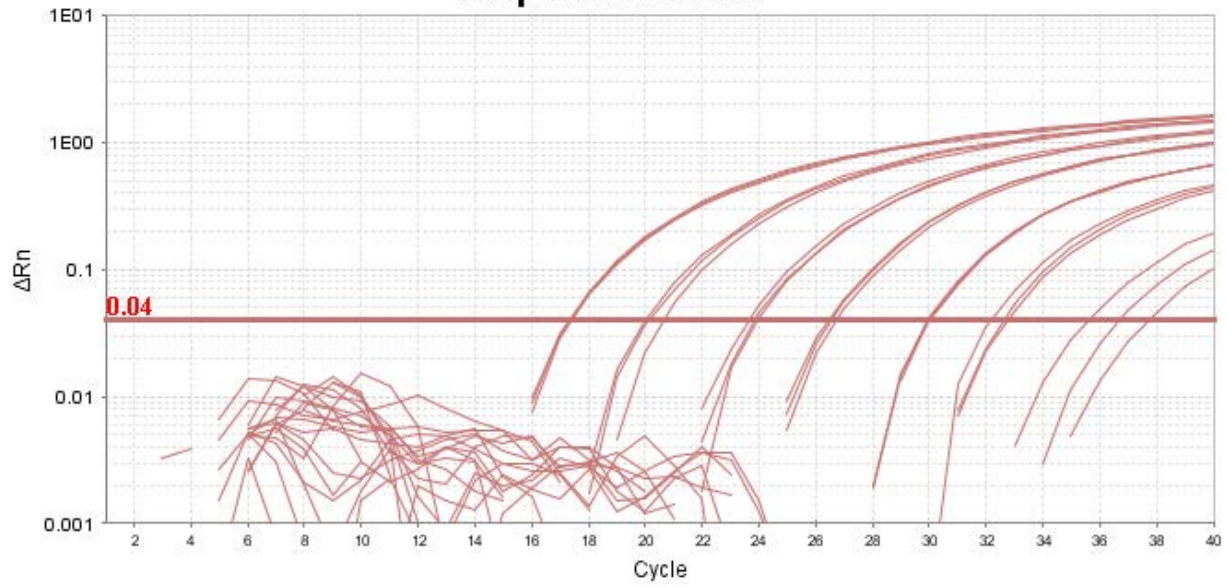

### Standard Curve

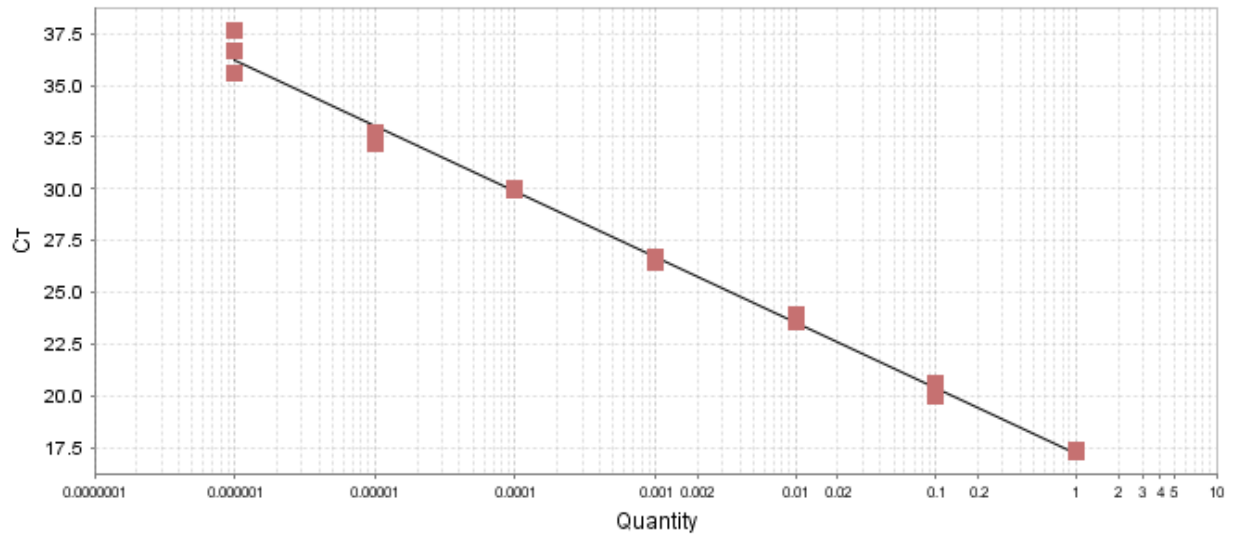

Slope: -3.17  
 $R^2$ : 0.995  
Eff%: 106.756  
Error: 0.059

## NSPaV

### Amplification Plot

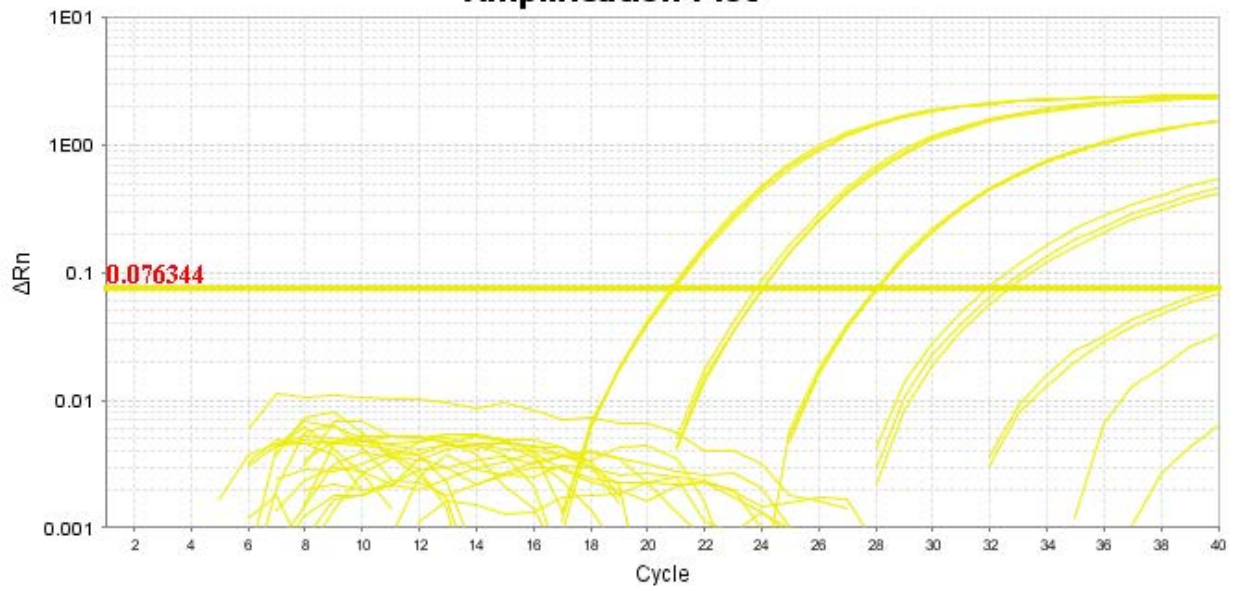

### Standard Curve

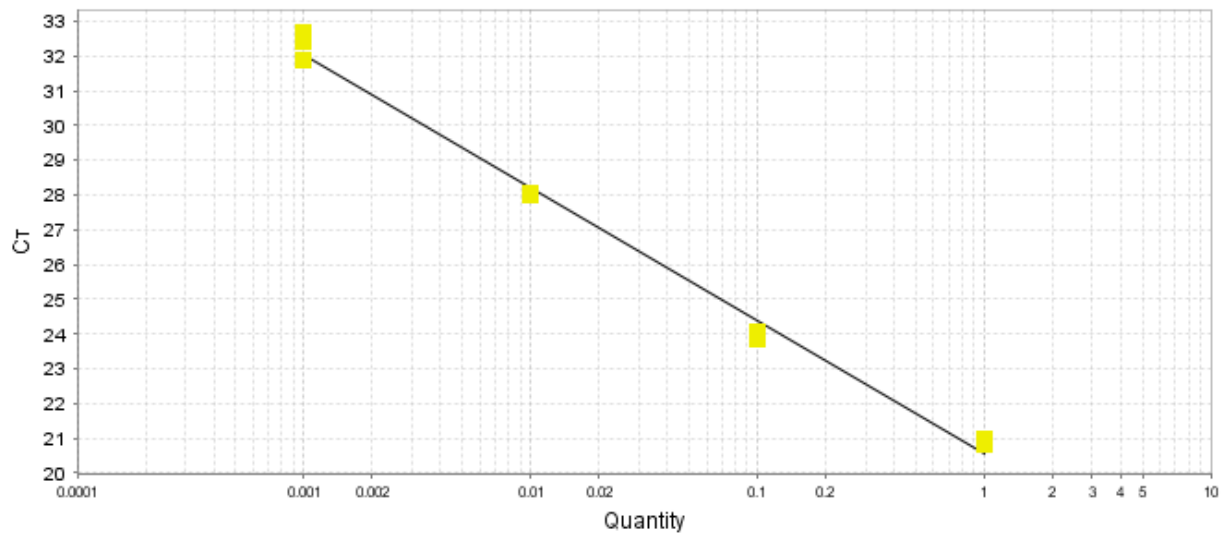

Slope: -3.835

$R^2$ : 0.993

Eff%: 82.29

Error: 0.103

## NVM

### Amplification Plot

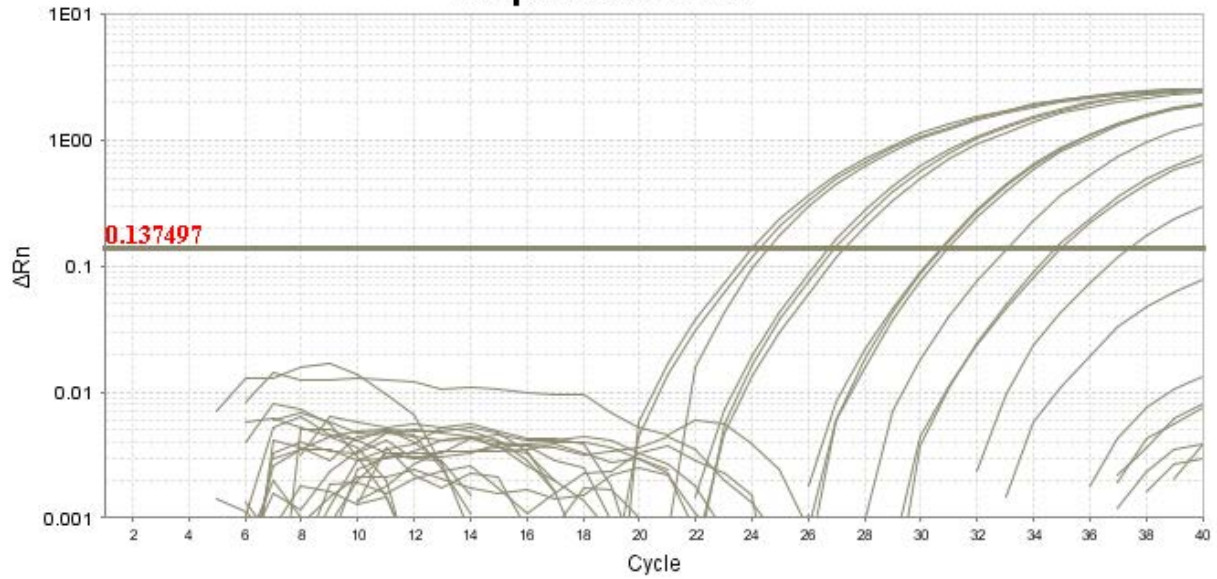

### Standard Curve

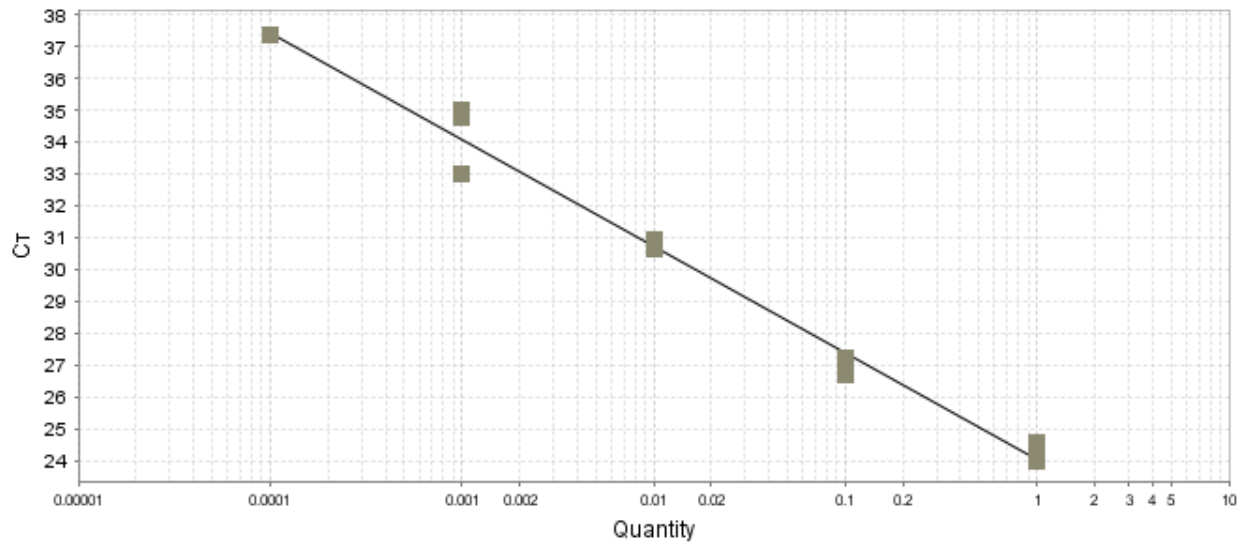

Slope: -3.363

$R^2$ : 0.985

Eff%: 98.314

Error: 0.124

# PBNSPaV

## Amplification Plot

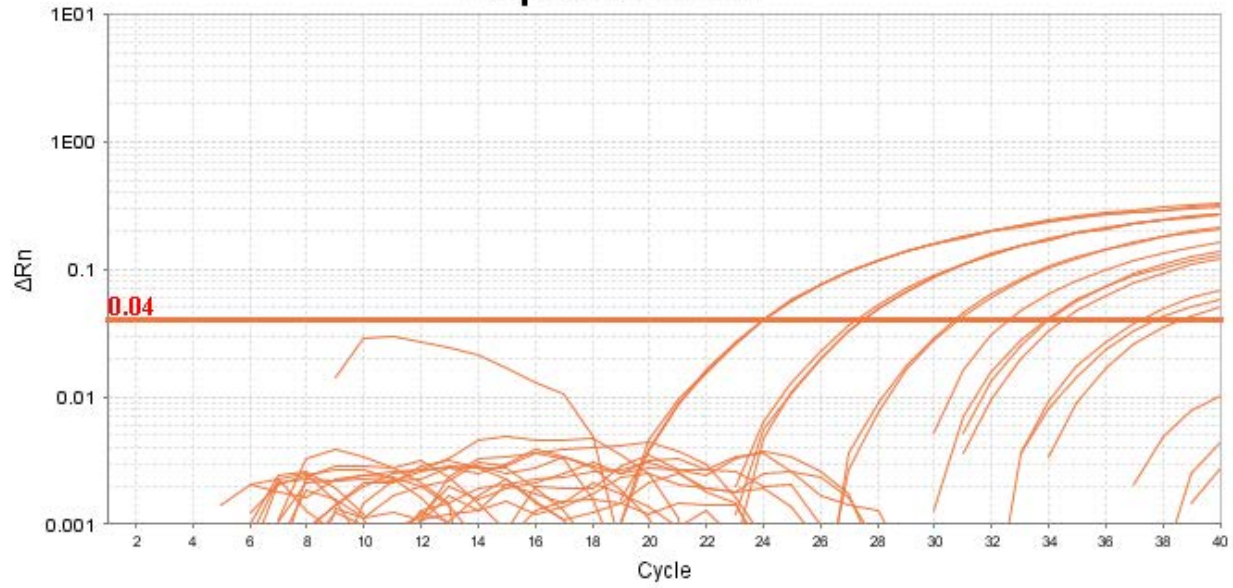

## Standard Curve

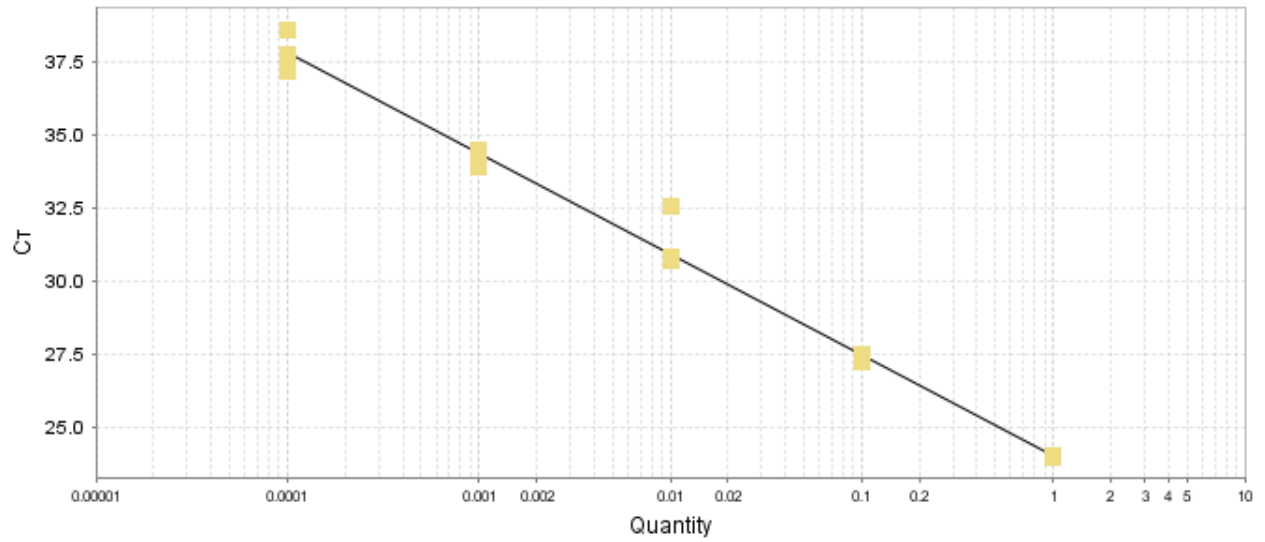

Slope: -3.447

$R^2$ : 0.988

Eff%: 95.036

Error: 0.104

## PcMV

### Amplification Plot

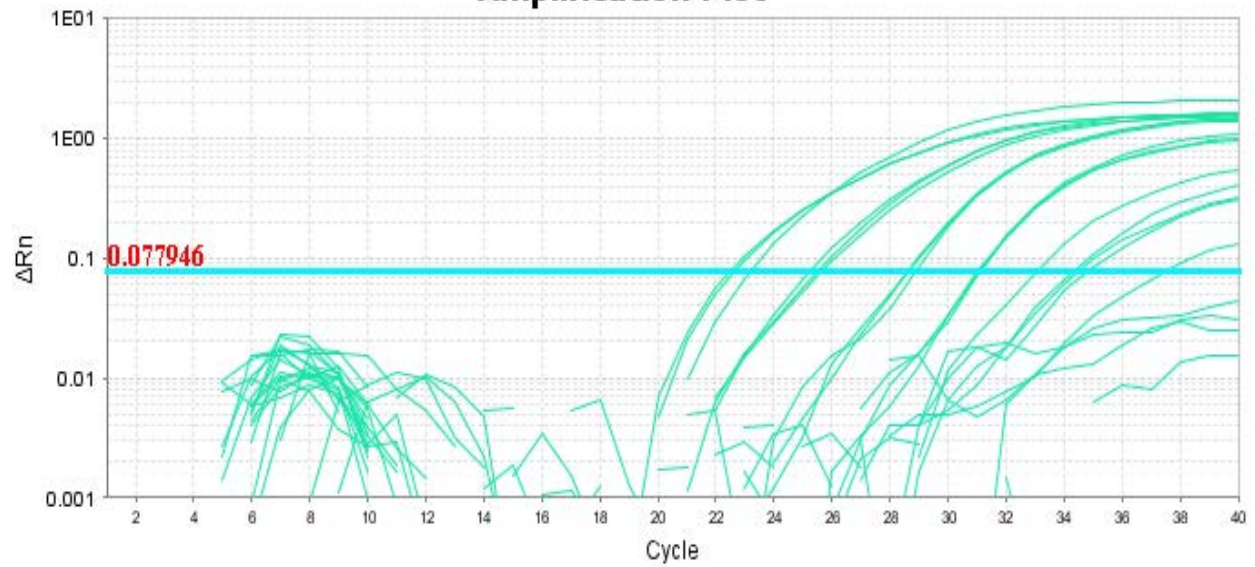

### Standard Curve

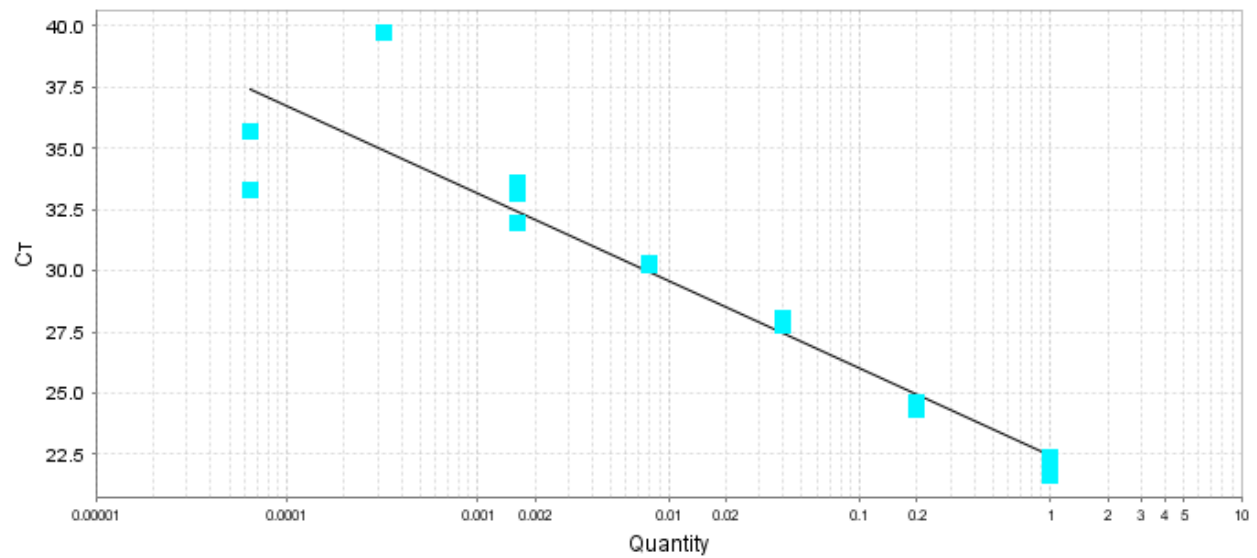

Slope: -3.558

$R^2$ : 0.892

Eff%: 91.021

Error: 0.31

## PDV

### Amplification Plot

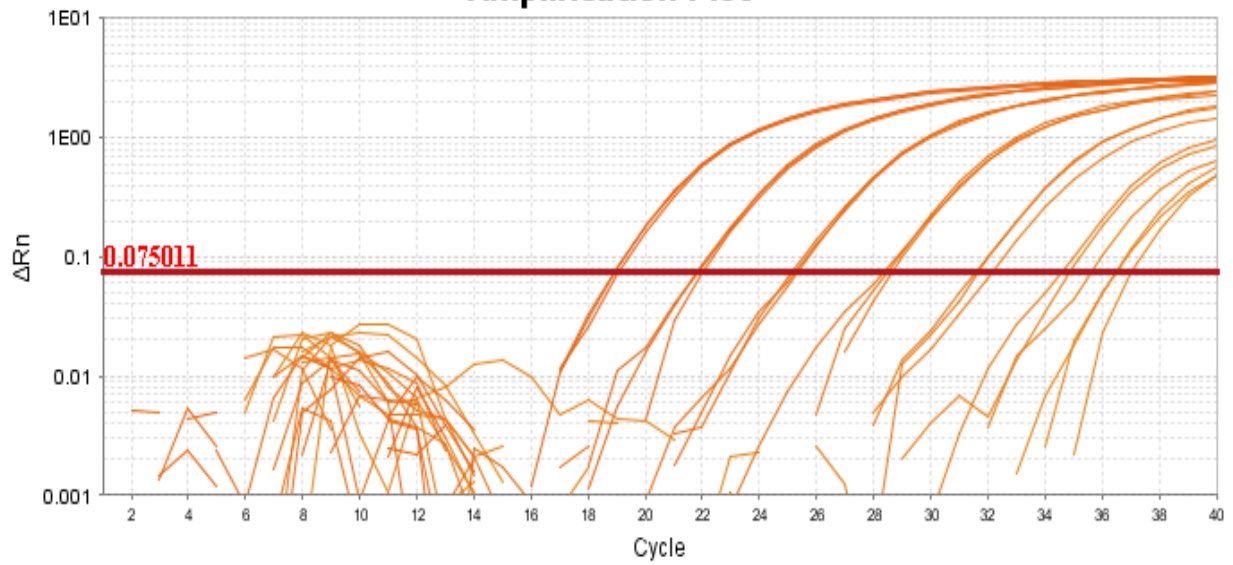

### Standard Curve

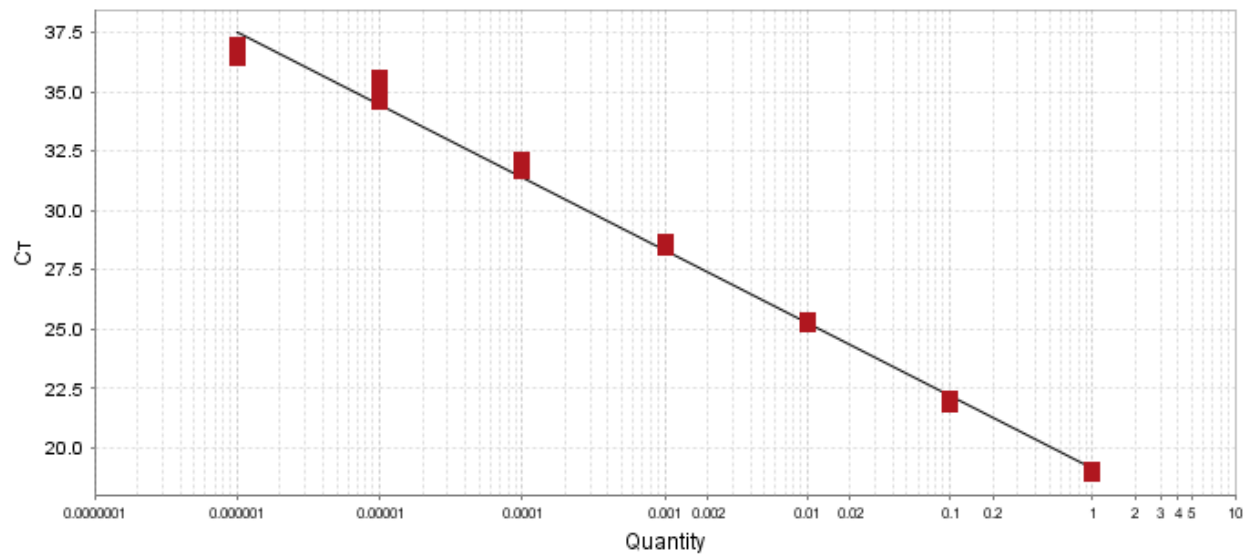

Slope: -3.06

$R^2$ : 0.993

Eff%: 112.22

Error: 0.058

## PNRSV

### Amplification Plot

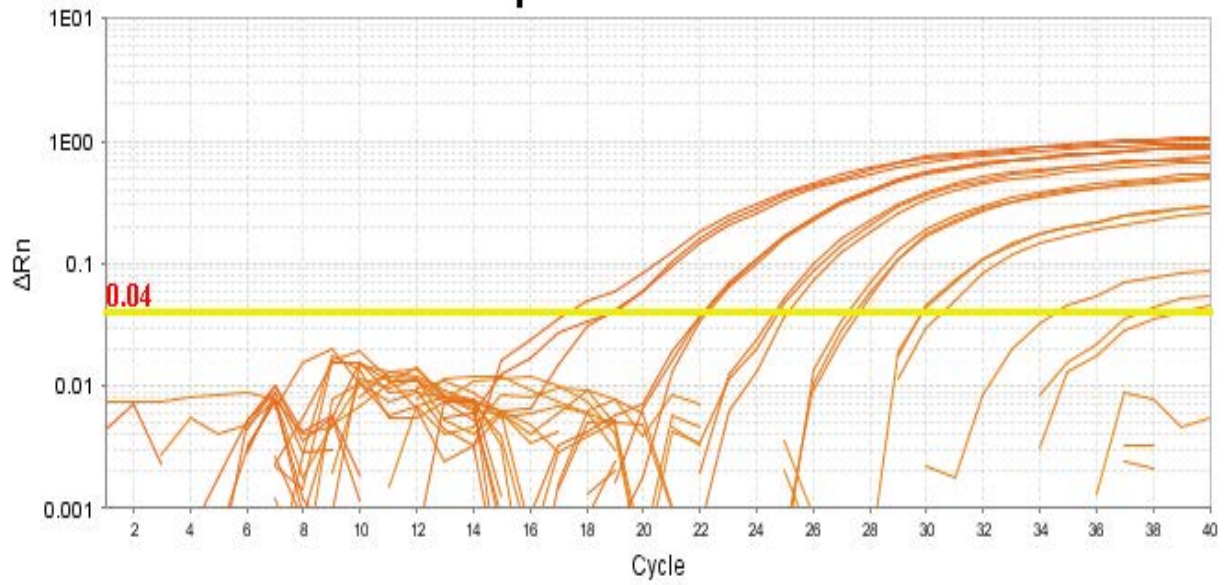

### Standard Curve

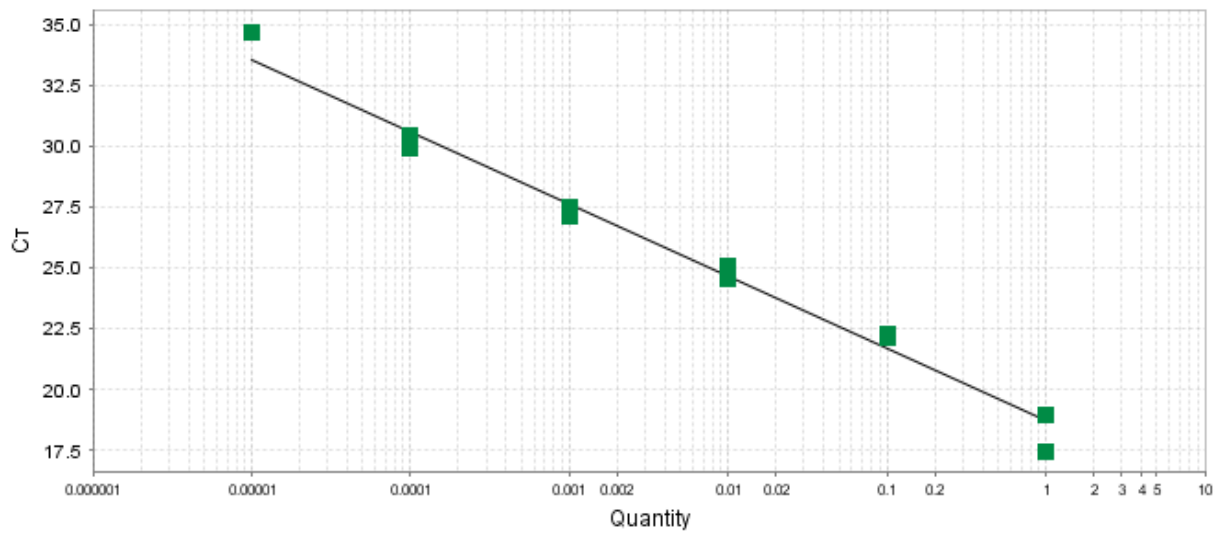

Slope: -2.965

$R^2$ : 0.985

Eff%: 117.382

Error: 0.098
