# Supplementary material for: Comprehensive Real-Time RT-PCR Assays for the Detection of Fifteen Viruses Infecting Prunus spp
Source: Plants (Basel). 2020 Feb 19;9(2):273. doi: 10.3390/plants9020273 (PMC7076543; doi:10.3390/plants9020273)
Supplement: Supplementary file 1 [file plants-09-00273-s001.zip › Table S1.xlsx]

## Sheet: Sheet1
Sample ID	Tree	Infection determined by HTS
		ACLSV	CGRMV	CLRV	CNRMV	CRLV	CRMaV	CVA	LChV-1	LChV-2	NSPaV	NVM	PBNSPaV	PcMV	PDV	PNRSV
15050	Cherry	X				X
15709	Cherry			X
15710	Cherry			X
15711	Cherry	X				X
58592	Plum
69602	Cherry								X
69603	Cherry								X
74604	Plum												X
74605	Cherry
74610	Peach	X	X		X											X
74614	Cherry							X		X
74626	Peach	X	X		X								X			X
74632	Peach	X											X			X
74633	Cherry							X		X
74634	Cherry							X		X
82538	Apricot												X
82730	Cherry							X
82736	Cherry		X					X
82738	Cherry							X
82810	Peach
82811	Peach	X
82812	Peach
82816	Peach												X
82818	Peach												X
82828	Almond															X
82829	Peach												X
82831	Peach
82909	Apricot												X
82915	Cherry							X
82923	Cherry							X
82924	Cherry							X
82933	Cherry		X					X
82941	Peach
82944	Peach	X
82947	Peach
82959	Peach												X
82965	Peach												X
83004	Peach
84206	Nectarine															X
84535	Cherry
84537	Cherry														X
84570	Cherry														X
84571	Cherry							X							X
84673	Cherry							X
84833	Cherry														X
84834	Cherry							X
85086	Cherry							X
85087	Cherry							X
85088	Cherry							X
85089	Cherry							X
85090	Cherry							X
85635	Nectarine															X
85636	Nectarine															X
85637	Nectarine															X
85639	Nectarine															X
85640	Nectarine															X
85805	Peach															X
87202	Cherry														X
87205	Cherry														X	X
87428	Cherry
87429	Cherry
87430	Cherry
88303	Nectarine										X
89084	Cherry		X												X
89086	Cherry		X												X
89088	Cherry														X
89091	Cherry							X
89092	Cherry							X
89093	Cherry							X							X
89104	Cherry		X		X			X	X
89145	Nectarine										X
95547	Almond															X
95644	Peach											X
95694	Almond															X
95712	Peach
95713	Peach														X	X
95875	Cherry														X
95900	Nectarine
95901	Nectarine
95903	Peach
95904	Peach
95905	Peach
95906	Peach														X	X
96067	Cherry		X		X
96068	Cherry							X
96425	Peach													X
96442	Cherry						X	X							X
