# Supplementary material for: Comprehensive Real-Time RT-PCR Assays for the Detection of Fifteen Viruses Infecting Prunus spp
Source: Plants (Basel). 2020 Feb 19;9(2):273. doi: 10.3390/plants9020273 (PMC7076543; doi:10.3390/plants9020273)
Supplement: Supplementary file 1 [file plants-09-00273-s001.zip › Table S2.xlsx]

## Sheet: Sheet1
SID	Crop	Taxon	Origin	Variety	P_ACLSV	P_CGRMV	P_CLRV	P_CNRMV	P_CRLV	P_CRMV	P_CVA	P_LChV1	P_LChV2	P_NSPaV	P_NVM	P_PBNSPaV	P_PcMV	P_PDV	P_PNRSV
16632	Almond	Prunus dulcis	Turkmenistan	Ai-Dere-149	0	0	0	0	0	0	0	0	0	0	0	0	0	0	27.8 / POS
16659	Almond	Prunus dulcis	United States, California	Vesta	0	0	0	0	0	0	0	0	0	0	0	0	0	0	23.4 / POS
16665	Almond	Prunus dulcis	United States, California	Languedoc	0	0	0	0	0	0	0	0	0	0	0	0	0	0	21.6 / POS
16672	Almond	Prunus hybr.	Japan	Hann Almond	0	0	0	0	0	0	0	0	0	0	0	0	0	0	21.1 / POS
16674	Almond	Prunus dulcis	Iran	Seedling # 5-15	0	0	0	0	0	0	0	0	0	0	0	0	0	0	23.6 / POS
16676	Almond	Prunus dulcis	Spain, Tarragona	Tarragonna	0	0	0	0	0	0	0	0	0	0	0	0	0	0	24.3 / POS
16720	Almond	Prunus dulcis	Pakistan	880639	0	0	0	0	0	0	0	0	0	0	0	0	0	0	23.2 / POS
16728	Almond	Prunus dulcis	Pakistan	880739	0	0	0	0	0	0	0	0	0	0	0	0	0	0	27.5 / POS
16748	Almond	Prunus dulcis	Nepal	1-112	0	0	0	0	0	0	0	0	0	0	0	0	0	0	23.9 / POS
16749	Almond	Prunus dulcis	Romania	Ardechoise	0	0	0	0	0	0	0	0	0	0	0	0	0	0	29.3 / POS
16751	Almond	Prunus dulcis	Romania	De Dioso	0	0	0	0	0	0	0	0	0	0	0	0	0	0	23.2 / POS
16809	Almond	Prunus dulcis	Not available	Tardy Nonpariel	0	0	0	0	0	0	0	0	0	0	0	0	0	0	22.7 / POS
16810	Almond	Prunus dulcis	Ukraine	#53	0	0	0	0	0	0	0	0	0	0	0	0	0	0	19.7 / POS
16820	Almond	Prunus dulcis	Ukraine	Primorskiy	0	0	0	0	0	0	20.5 / POS	0	0	0	0	0	0	0	0
16889	Cherry	Prunus cerasus	Italy	Bianco Rosato Di Piemonte	0	23.2 / POS	0	0	0	0	21.0 / POS	0	0	0	0	0	0	22.8 / POS	19.8 / POS
16890	Cherry	Prunus avium	Netherlands	Cuvelier	26.2 / POS	18.3 / POS	0	0	0	0	22.1 / POS	22.9 / POS	0	0	0	0	0	20.4 / POS	23.6 / POS
16893	Cherry	Prunus avium	Germany	Flamentiner	25.9 / POS	0	0	0	0	0	0	0	0	0	0	0	0	19.4 / POS	0
16897	Cherry	Prunus avium	United States, Ohio	Sweet September	0	0	0	0	0	0	0	0	0	0	0	0	0	0	23.0 / POS
16906	Cherry	Prunus avium	United States, New York	Black Eagle	0	18.0 / POS	0	26.0 / POS	0	0	20.2 / POS	0	0	0	0	0	0	22.9 / POS	22.9 / POS
16914	Cherry	Prunus avium	Hungary	MAJASI HOSSZUSZARU	0	23.2 / POS	0	27.8 / POS	0	0	22.0 / POS	0	0	0	0	0	0	18.8 / POS	21.6 / POS
16920	Cherry	Prunus cerasus	Former Serbia and Montenegro	SOUR CHARI	0	0	0	0	0	0	19.8 / POS	0	0	0	0	0	0	0	0
16921	Cherry	Prunus cerasus	Sweden	Stora Klarbar	0	0	0	0	0	0	20.2 / POS	0	0	0	0	0	0	0	0
16922	Cherry	Prunus avium	Netherlands	Mierlose Swarte	0	0	0	0	0	0	20.3 / POS	0	0	0	0	0	0	0	0
16924	Cherry	Prunus avium	Sweden	Sussweichsel Aus Olivet	0	0	0	0	0	0	0	20.5 / POS	0	0	0	0	0	0	0
16929	Cherry	Prunus avium	United Kingdom, England	Merton Bigarreau	0	0	0	0	0	0	20.2 / POS	0	0	0	0	0	0	19.6 / POS	26.5 / POS
16931	Cherry	Prunus cerasus	Romania	Rosii De Istrita	0	0	0	0	0	0	20.2 / POS	0	0	0	0	0	0	0	0
16934	Cherry	Prunus avium	Romania	H-bristrita XXX/1-4	0	27.9 / POS	0	0	0	0	17.6 / POS	0	0	0	0	0	0	0	0
16936	Cherry	Prunus cerasus	Hungary	Erdi Jubileum	0	27.3 / POS	0	0	0	0	18.0 / POS	0	0	0	0	0	0	0	0
16940	Cherry	Prunus spp.	Bulgaria	DPRU 1734	0	14.7 / POS	0	0	0	0	20.2 / POS	0	0	0	0	0	0	18.5 / POS	0
16945	Cherry	Prunus spp.	Bulgaria	B92-236	0	28.2 / POS	0	0	0	0	20.8 / POS	0	0	0	0	0	0	0	0
16949	Cherry	Prunus cerasus	France	Belle de Planchoury	0	22.1 / POS	0	0	0	0	19.9 / POS	21.7 / POS	0	0	0	0	0	21.6 / POS	19.6 / POS
16967	Cherry	Prunus avium	United States, Montana	Muskateller	0	22.0 / POS	0	0	0	0	21.5 / POS	0	0	0	0	0	0	20.0 / POS	22.1 / POS
16969	Cherry	Prunus avium	Switzerland	Merton Heart	0	20.4 / POS	0	0	0	0	19.1 / POS	21.4 / POS	0	0	0	0	0	19.1 / POS	19.7 / POS
16984	Cherry	Prunus avium	United States, Utah	Bing, Long Stem #1	0	21.2 / POS	0	0	0	0	0	0	0	0	0	0	0	20.2 / POS	22.3 / POS
16986	Cherry	Prunus avium	Canada	Spur Van	0	16.3 / POS	0	0	0	0	0	0	0	0	0	0	0	19.6 / POS	0
16987	Cherry	Prunus cerasus	Romania	Ostheim 32/16	0	17.8 / POS	0	0	0	0	19.3 / POS	0	0	0	0	0	0	20.7 / POS	0
16993	Cherry	Prunus mahaleb	France	SL 64	0	0	0	0	0	0	0	0	0	0	0	0	0	16.8 / POS	19.5 / POS
17001	Cherry	Prunus avium	United States, California	Governor Wood	0	16.7 / POS	0	0	0	0	0	0	0	0	0	0	0	17.0 / POS	0
17019	Cherry	Prunus avium	Italy	Bianca Di Verona	0	0	0	0	0	0	17.7 / POS	0	0	0	0	0	0	18.8 / POS	0
17023	Cherry	Prunus avium	Czech Republic	P-HL-B	0	0	0	0	0	0	27.3 / POS	0	0	0	0	0	0	0	0
17043	Cherry	Prunus avium	Albania	AL 044	0	0	0	0	0	0	17.4 / POS	0	0	0	0	0	0	21.0 / POS	18.7 / POS
17093	Cherry	Prunus avium	Japan	Sato Nishiki	0	26.0 / POS	0	0	0	0	0	0	0	0	0	0	0	0	22.0 / POS
17094	Cherry	Prunus avium	New Zealand	Dawson	0	0	0	0	0	0	23.7 / POS	0	0	0	0	0	0	0	22.7 / POS
17096	Cherry	Prunus avium	Italy	Big Burlat (69-1-118BL)	0	0	0	0	0	0	19.0 / POS	0	0	0	0	0	0	0	22.3 / POS
17100	Cherry	Prunus cerasus	Serbia	Kelleris 14	0	0	0	0	0	0	0	0	0	0	0	0	0	0	21.4 / POS
17103	Cherry	Prunus avium	United States, New York	Abundance	0	16.8 / POS	0	0	0	0	24.1 / POS	0	0	0	0	0	0	21.0 / POS	0
17119	Cherry	Prunus x yedoensis	Japan	amagi-yoshino	0	0	0	0	0	0	20.5 / POS	0	22.9 / POS	0	0	0	0	27.4 / POS	0
17133	Cherry	Prunus spp.	United Kingdom	DPRU 2236	0	0	0	0	0	0	18.3 / POS	0	0	0	0	0	0	0	0
17144	Cherry	Prunus serotina	United States, California	Emerich #1	0	0	0	0	0	0	0	0	0	0	0	0	0	0	20.5 / POS
17147	Cherry	Prunus spp.	Russian Federation	Pamjat Vavilova	0	0	0	0	0	0	19.4 / POS	0	0	0	0	0	0	0	0
17155	Cherry	Prunus cerasus	Germany	Spanische Glaskirsche	0	21.2 / POS	0	0	0	0	18.8 / POS	0	0	0	0	0	0	22.6 / POS	0
17156	Cherry	Prunus pseudocerasus	United States	24 Sichuan	0	0	0	0	0	0	0	0	0	0	0	0	0	25.7 / POS	0
17162	Cherry	Prunus mahaleb	Turkey	DPRU 1557	0	0	0	0	0	0	20.3 / POS	0	0	0	0	0	0	22.6 / POS	20.4 / POS
17606	Plum	Prunus domestica	United Kingdom	Early Laxton	0	0	0	0	0	0	0	0	0	0	0	0	0	0	19.3 / POS
17607	Plum	Prunus domestica	Germany	Blaue Eierpflaume	0	0	0	0	0	0	0	0	0	0	0	25.8 / POS	0	0	0
17615	Plum	Prunus spp.	India, Uttar Pradesh	Botanky	0	0	0	0	0	0	0	0	0	0	0	23.1 / POS	0	0	0
17622	Plum	Prunus domestica	Morocco	Saint Jean	0	0	0	0	0	0	0	0	0	0	0	0	0	0	25.0 / POS
17628	Plum	Prunus hybr.	Australia	Chalco	0	0	0	0	0	0	0	0	0	0	0	0	0	10.1 / POS	18.8 / POS
17630	Plum	Prunus spp.	United States, California	Yellow Cherry Plum	0	0	0	0	0	0	0	0	0	0	0	0	0	0	22.6 / POS
17637	Plum	Prunus americana	United States, Iowa	Wolf	0	0	0	0	0	0	0	0	0	0	0	0	0	0	19.5 / POS
17640	Plum	Prunus rivularis	United States, California	Late Goose	0	0	0	0	0	0	0	0	0	0	0	26.4 / POS	0	0	19.4 / POS
17656	Plum	Prunus hybr.	United States, California	Etter's Best	0	0	0	0	0	0	25.2 / POS	0	0	0	0	25.1 / POS	0	0	29.0 / POS
17666	Plum	Prunus domestica subsp. insititia	Japan	Gold Bullace	0	0	0	0	0	0	21.9 / POS	0	0	0	0	25.0 / POS	0	0	0
17670	Plum	Prunus x dasycarpa	Poland	Irany Oliu	0	0	0	0	0	0	20.6 / POS	0	0	0	0	0	0	0	0
17678	Plum	Prunus cerasifera	Uzbekistan	Wild Plum	0	0	0	0	0	0	0	0	0	0	0	0	0	0	28.6 / POS
17702	Plum	Prunus domestica	France	Quetsche Blanche De Letricourt	0	0	0	0	0	0	22.3 / POS	0	0	0	0	25.0 / POS	0	0	0
17710	Plum	Prunus salicina	New Zealand	Victory	0	0	0	0	0	0	0	0	0	0	0	24.0 / POS	0	0	0
17720	Plum	Prunus domestica	Morocco	Little Mirabelle	24.6 / POS	0	0	0	0	0	21.2 / POS	0	0	0	0	0	0	0	23.8 / POS
17730	Plum	Prunus cerasifera	Unknown	Kok Sultan	0	0	0	0	0	0	0	0	0	0	0	0	0	0	23.5 / POS
17747	Plum	Prunus bokhariensis	India	Alubokhara Early Large Red #8	0	0	0	0	0	0	0	0	0	0	0	29.7 / POS	0	0	22.9 / POS
17749	Plum	Prunus salicina	New Zealand	Cambridge	0	0	0	0	0	0	0	0	0	0	0	0	0	13.3 / POS	22.4 / POS
17750	Plum	Prunus spp.	India	Alubokhara	0	0	0	0	0	0	21.5 / POS	0	0	0	0	0	0	0	26.7 / POS
17757	Plum	Prunus domestica	Italy	Altesse Double	0	0	0	0	0	0	0	0	0	0	0	23.3 / POS	0	0	0
17761	Plum	Prunus americana	Australia	Anderson	0	0	0	0	0	0	0	0	0	0	0	0	0	11.7 / POS	0
17765	Plum	Prunus domestica	Belgium	Altesse Simple	0	0	0	0	0	0	0	0	0	0	0	0	0	0	21.1 / POS
17774	Plum	Prunus bokhariensis	India, Uttar Pradesh	Alubokhara Large	0	0	0	0	0	0	0	0	0	0	0	26.6 / POS	0	0	0
17799	Plum	Prunus subcordata	United States	G.M. Clark	0	0	0	0	0	0	0	0	0	0	0	28.9 / POS	0	0	24.4 / POS
17801	Plum	Prunus salicina	United States, California	Formosa	0	0	0	0	0	0	0	0	0	0	0	25.4 / POS	0	0	25.7 / POS
17841	Plum	Prunus domestica	United States, Oregon	Rene Des Mirabelles	24.5 / POS	0	0	0	0	0	0	0	0	0	0	0	0	0	23.2 / POS
17855	Plum	Prunus domestica subsp. domestica	Former Serbia and Montenegro	Pozegaca D-13	0	0	0	0	0	0	0	26.0 / POS	0	0	0	0	0	0	0
17867	Plum	Prunus domestica subsp. domestica	Bosnia and Herzegovina	Pozegaca M-1	0	0	0	0	0	0	0	0	0	0		25.0 / POS	0	0	0
17901	Plum	Prunus domestica	Former Serbia and Montenegro	W1	0	0	0	0	0	0	0	26.8 / POS	0	0	0	0	0	0	22.4 / POS
17943	Plum	Prunus salicina	United States, California	Elephant Heart	0	0	0	0	0	0	0	0	0	0	0	25.0 / POS	0	0	0
17944	Plum	Prunus salicina	United States, California	Howard's Miracle	0	0	0	0	0	0	0	23.5 / POS	0	0	0	23.6 / POS	0	0	22.3 / POS
17989	Plum	Prunus spinosa	Switzerland	Mouti di Rouco	0	0	0	0	0	0	0	0	0	0	0	0	0	0	24.2 / POS
18136	Plum	Prunus spp.	Turkmenistan	Karakalinskaya	0	0	0	0	0	0	22.8 / POS	0	0	0	0	27.4 / POS	0	0	0
18234	Peach	Prunus persica	United States, California	P 35- 40	0	0	0	0	0	0	0	0	0	0	23.9 / POS	0	0	0	0
18236	Peach	Prunus persica	United States, California	P 61- 30	0	0	0	0	0	0	0	0	0	0	24.0 / POS	0	0	0	0
18248	Peach	Prunus persica	United States, California	Y317 - 30	0	0	0	0	0	0	0	0	0	0	25.0 / POS	0	0	0	0
18254	Peach	Prunus persica	United States, California	Y419-157 PF	0	0	0	0	0	0	0	0	0	0	24.4 / POS	0	0	0	0
18260	Peach	Prunus persica	United States, California	Y423-189	0	0	0	0	0	0	0	0	0	0	24.0 / POS	0	0	0	0
18282	Peach	Prunus persica	United States, California	Y418-372	0	0	0	0	0	0	0	0	0	0	23.9 / POS	0	0	0	0
18306	Peach	Prunus persica	United States, California	Y434- 40	0	0	0	0	0	0	0	0	0	0	23.2 / POS	0	0	0	0
18326	Peach	Prunus persica	United States, New Jersey	NJ652163012	0	0	0	0	0	0	0	0	0	0	0	0	0	0	22.7 / POS
18343	Peach	Prunus persica	United States, Washington	LOV-1-DHAPLOID	0	0	0	0	0	0	0	0	0	0	0	0	0	0	21.8 / POS
18387	Peach	Prunus hybr.	United States, California	Peacot	0	21.6 / POS	0	0	0	0	0	0	0	0	0	0	0	0	22.1 / POS
18390	Peach	Prunus persica	Russian Federation	Rogany Goy	0	0	0	0	0	0	0	0	0	0	0	0	0	0	21.7 / POS
18391	Peach	Prunus persica	Canada, British Columbia	leaf curl resistant peach	0	0	0	0	0	0	0	0	0	0	0	0	0	0	21.1 / POS
18399	Peach	Prunus persica	China	Tzim Pee Tao	0	0	0	0	0	0	0	0	0	0	0	0	0	0	20.8 / POS
18400	Peach	Prunus persica	China	Tzim Pee Tao	0	0	0	0	0	0	0	0	0	0	0	0	0	0	21.0 / POS
18402	Peach	Prunus persica	China	Hui Hun Tao	0	0	0	0	0	0	0	0	0	0	0	0	0	0	19.9 / POS
18409	Peach	Prunus persica	Japan	Kawanakajima Hakutou	0	0	0	0	0	0	0	0	0	0	0	0	0	0	18.2 / POS
18414	Peach	Prunus persica	Japan	Kawanakajima Hakutou	0	0	0	0	0	0	0	0	0		0	0	0	0	20.4 / POS
18415	Peach	Prunus persica	Ukraine	#60	0	0	0	0	0		0	0	0	0	0	0	0	0	22.1 / POS
18420	Peach	Prunus persica	France	Sanguine de Chateauneuf	0	0	0	0	0	0	0	0	0	0	0	0	0	0	12.5 / POS
18423	Peach	Prunus persica	France	Sanguine de Chateauneuf	0	0	0	0	0	0	0	0	0	0	0	0	0	0	17.6 / POS
18429	Peach	Prunus hybr.	Poland	No. 397/VIII-4	0	0	0	0	0	0	0	0	0	0	0	0	0	0	29.5 / POS
18459	Peach	Prunus persica	United States, California	Golden Prolific Dwarf	0	0	0	0	0	0	0	0	0	0	0	0	0	0	19.6 / POS
18461	Peach	Prunus persica	China	Chinese Cling	19.7 / POS	0	0	22.2 / POS	0	0	0	0	0	0	0	0	0	0	16.8 / POS
18463	Peach	Prunus persica	Japan	Nishiki	19.1 / POS	0	0	21.4 / POS	0	0	0	0	0	0	0	0	0	0	0
18465	Peach	Prunus persica	China	Chinese Flat	18.8 / POS	0	0	0	0	0	0	0	0	0	0	24.7 / POS	0	0	16.9 / POS
18467	Peach	Prunus persica var. persica	Korea, South, Kyonggi	Yumyeong	21.3 / POS	0	0	0	0	0	0	0	0	0	0	0	0	0	0
18469	Peach	Prunus persica	China	Bai Mang Pen Tao	0	0	0	0	0	0	0	0	0	0	0	27.1 / POS	0	0	0
18475	Peach	Prunus persica var. persica	Nepal	710	0	0	0	0	0	0	0	0	0	0	0	23.1 / POS	0	0	0
18481	Peach	Prunus persica var. persica	China	Kou Ho	20.5 / POS	0	0	0	0	0	0	0	23.6 / POS	0	0	25.8 / POS	0	0	20.4 / POS
18483	Peach	Prunus persica	China	Zin Dai Jiu Bao	0	0	0	0	0	0	0	0	0	0	0	25.5 / POS	0	0	22.5 / POS
18491	Peach	Prunus persica	India	Kinnauri	0	0	0	0	0	0	0	0	0	0	28.0 / POS	0	0	0	0
18559	Peach	Prunus persica	Azerbaijan	Shaki	0	0	0	0	0	0	0	0	0	0	0	0	0	0	20.9 / POS
18573	Peach	Prunus persica	Brazil	Xavante	0	0	0	0	0	0	0	0	0	0	0	0	0	0	22.0 / POS
18575	Peach	Prunus persica	Brazil	Baronesa	0	0	0	0	0	0	0	0	0	0	0	0	0	0	20.8 / POS
18577	Peach	Prunus persica	Mexico	Carlos	0	20.0 / POS	0	0	0	0	0	0	0	0	0	0	16.0 / POS	0	19.2 / POS
18578	Peach	Prunus persica	Mexico	Carlos	0	20.0 / POS	0	0	0	0	0	0	0	0	0	0	17.3 / POS	0	18.7 / POS
18581	Peach	Prunus persica	Mexico	Aguascalientes 12-12	0	0	0	0	0	0	0	0	0	0	0	0	0	22.3 / POS	17.5 / POS
18586	Peach	Prunus persica	Spain, Castellon de Plana	KIANG-SI	0	0	0	0	0	0	0	0	0	0	0	25.5 / POS	0	0	21.5 / POS
18595	Peach	Prunus persica	Brazil	Turquesa	0	0	0	0	0	0	0	0	0	0	25.6 / POS	0	0	0	0
18609	Peach	Prunus persica	Guatemala	Criollo	0	0	0	0	0	0	0	0	0	0	0	0	0	0	18.2 / POS
18613	Peach	Prunus persica	Czechoslovakia	Red Slovenia	26.1 / POS	0	0	0	0	0	0	0	0	0	0	0	0	0	21.8 / POS
18614	Peach	Prunus persica	Czechoslovakia	Red Slovenia	26.8 / POS	0	0	0	0	0	0	0	0	0	0	0	0	0	23.4 / POS
18617	Peach	Prunus persica var. nucipersica	South Africa	Gold Mine	0	0	0	0	0	0	0	0	0	0	0	0	0	0	21.2 / POS
18618	Peach	Prunus persica var. nucipersica	South Africa	Gold Mine	0	0	0	0	0	0	0	0	0	0	0	0	0	0	21.5 / POS
18619	Peach	Prunus persica var. nucipersica	Syria	Stanwick	0	0	0	0	0	0	0	0	0	0	0	0	0	0	16.4 / POS
18629	Peach	Prunus persica	Uzbekistan, Tashkent	Tashkent Gold	0	0	0	0	0	0	0	0	0	0	28.5 / POS	23.2 / POS	0	0	0
18635	Peach	Prunus persica	United States, California	Lord Napier	23.2 / POS	0	0	0	0	0	19.9 / POS	19.1 / POS	0	0	0	0	0	0	21.0 / POS
18637	Peach	Prunus persica	United States, California	Panamint	0	0	0	0	0	0	0	0	0	0	0	24.1 / POS	0	0	0
18641	Peach	Prunus persica var. persica	Italy	Andromeda	0	0	0	0	0	0	0	0	0	0	0	0	0	0	19.1 / POS
18643	Peach	Prunus persica	United States, California	Stribling Giant Free	0	0	0	0	0	0	0	0	0	0	0	0	0	0	18.0 / POS
18671	Peach	Prunus persica	Spain	Amarillo Tardio	0	0	0	0	0	0	0	0	0	0	0	0	0	0	22.2 / POS
18683	Peach	Prunus persica	United States, California	Halloween	24.8 / POS	0	0	0	0	0	0	0	0	0	0	0	0	0	20.3 / POS
18689	Peach	Prunus persica	United States, California	Early Crawford	0	0	0	0	0	0	0	0	0	21.9 / POS	0	0	0	0	0
18691	Peach	Prunus persica	United States, California	Late Crawford	20.7 / POS	23.4 / POS	0	0	0	0	0	0	0	0	0	0	0	0	23.0 / POS
18693	Peach	Prunus persica	United States, California	Baby Crawford	0	0	0	0	0	0	0	0	0	0	0	0	0	0	20.6 / POS
18699	Peach	Prunus persica	United States	GEORGE IV	19.8 / POS	19.8 / POS	0	0	0	0	0	0	0	0	0	0	0	0	0
18701	Peach	Prunus persica	United Kingdom, England	Peregrine	19.5 / POS	0	0	0	0	0	0	20.4 / POS	0	0	0	0	0	0	0
18714	Peach	Prunus persica	Poland	745	0	0	0	0	0	0	0	0	0	0	0	0	0	0	21.9 / POS
18717	Peach	Prunus persica	United States, Massachusetts	Foster	0	0	0	0	0	0	0	0	0	0	0	0	0	0	21.0 / POS
18723	Peach	Prunus persica	United States, California	Muir Peach	0	0	0	0	0	0	0	0	0	0	0	0	0	0	22.0 / POS
18727	Peach	Prunus persica	United Kingdom, England	Salway	0	0	0	0	0	0	0	0	0	0	0	22.6 / POS	0	0	19.1 / POS
18729	Peach	Prunus persica	United States, California	Rose	0	0	0	0	0	0	0	0	0	0	0	21.8 / POS	0	0	18.1 / POS
18731	Peach	Prunus persica	United States, California	Indian Freestone	0	0	0	0	0	0	0	0	0	0	0	0	0	0	19.8 / POS
18733	Peach	Prunus persica	United States, California	Indian Blood Free	0	0	0	0	0	0	0	0	0	0	0	0	0	0	22.6 / POS
18735	Peach	Prunus persica	United States	Indian Blood	0	0	0	0	0	0	0	0	0	0	0	0	0	0	17.7 / POS
18737	Peach	Prunus persica	United States, California	Indian Blood Cling	25.2 / POS	17.2 / POS	0	0	0	0	0	0	0	0	0	0	0	0	19.7 / POS
18739	Peach	Prunus persica	United States, California	Admiral Dewey	0	0	0	0	0	0	0	0	0	21.5 / POS	0	0	0	18.9 / POS	22.2 / POS
18747	Peach	Prunus persica	United States, California	Fortyniner	0	0	0	0	0	0	0	0	0	0	0	0	0	0	21.0 / POS
18757	Peach	Prunus persica var. persica	Poland	Kijewska Zapala	0	0	0	0	0	0	0	0	0	0	0	0	0	0	20.1 / POS
18836	Peach	Prunus persica	United States, California	Peento	21.8 / POS	0	0	0	0	0	0	0	0	0	0	24.1 / POS	0	0	20.3 / POS
18841	Peach	Prunus persica	United States, California	Polly	0	0	0	0	0	0	0	0	0	0	0	0	0	0	22.6 / POS
18851	Peach	Prunus persica	United States, California	Sanguine Tardeva	0	0	0	0	0	0	0	0	0	0	0	0	0	0	17.8 / POS
18853	Peach	Prunus persica	United States, California	Saturn	0	0	0	0	0	0	0	0	0	0	0	0	0	0	20.6 / POS
18857	Peach	Prunus persica	United States, California	Slappy	0	0	0	0	0	0	0	0	0	0	0	0	0	0	21.2 / POS
18863	Peach	Prunus persica	United States, California	Terzarola Col Pizzo	0	0	0	0	0	0	0	0	0	0	0	0	0	0	19.0 / POS
18867	Peach	Prunus persica	United States, California	White Hale	0	0	0	0	0	0	0	0	0	0	0	0	0	0	21.6 / POS
18903	Peach	Prunus spp.	Russian Federation	Pamirski	0	0	0	0	0	0	0	0	0	0	0	0	0	0	20.9 / POS
18909	Peach	Prunus persica	United Kingdom, England	Dymond	21.6 / POS	0	0	0	0	0	0	0	0	0	0	22.4 / POS	0	0	21.8 / POS
19065	Peach	Prunus persica	Australia, New South Wales	Pioneer	0	0	0	0	0	0	0	0	0	21.4 / POS	0	23.0 / POS	0	0	24.0 / POS
19390	Apricot	Prunus armeniaca	Pakistan	Almon	0	0	0	0	0	0	0	0	0	0	0	0	0	0	23.3 / POS
19475	Apricot	Prunus armeniaca	Afghanistan, Parwān	Kaisi (seedling)	0	0	0	0	0	0	0	0	0	0	0	0	0	0	20.2 / POS
19520	Apricot	Prunus armeniaca	Georgia	GE-2006-148	0	0	0	0	0	0	24.0 / POS	0	0	0	0	0	0	0	0
19534	Apricot	Prunus armeniaca	Hungary	Cegled De Mamut	0	0	0	0	0	0	0	19.0 / POS	0	0	0	0	0	0	0
19577	Apricot	Prunus armeniaca	United States	Canada White	0	0	0	0	0	0	0	0	0	0	0	0	0	0	28.6 / POS
19647	Apricot	Prunus spp.	Morocco	Belsiana (seedling)	0	0	0	0	0	0	0	0	0	0	0	26.2 / POS	0	0	0
19670	Apricot	Prunus mume	Japan	Tsuno-Ume	0	0	0	0	0	0	0	0	0	0	0	24.8 / POS	0	0	0
19671	Apricot	Prunus mume	Japan	Tama-ume	0	0	0	0	0	0	22.4 / POS	0	20.9 / POS	0	0	21.6 / POS	0	0	20.3 / POS
19727	Apricot	Prunus armeniaca	Turkistan	Shirpaivan	0	0	0	0	0	0	0	0	0	0	0	0	0	0	25.1 / POS
19730	Apricot	Prunus hybr.	Lebanon	Mesch-Mesch Amrah	0	0	0	0	0	0	0	0	0	0	0	0	0	0	25.5 / POS
20044	Peach	Prunus persica	Pakistan	880329	0	0	0	0	0	0	0	0	0	0	0	0	0	0	21.3 / POS
20046	Peach	Prunus persica	Pakistan	880330	0	0	0	0	0	0	0	0	0	0	0	0	0	0	19.5 / POS
20143	Peach	Prunus spp.	Thailand	Tho Muang	0	0	0	0	0	0	0	0	0	21.4 / POS	0	0	0	0	0
20147	Peach	Prunus spp.	Thailand	Tho Muang	0	0	0	0	0	0	0	0	0	0	0	0	0	0	23.2 / POS
20156	Peach	Prunus spp.	Korea, South	DPRU 3257	0	0	0	0	0	0	0	0	0	0	0	0	0	15.3 / POS	19.3 / POS
20159	Peach	Prunus hybr.	United States, Iowa	DPRU 536	0	0	0	0	0	0	0	0	0	0	0	29.9 / POS	0	27.7 / POS	27.6 / POS
20216	Peach	Prunus kansuensis	United States, New Jersey	DPRU 582	0	0	0	0	0	0	0	0	0	0	0	0	0	0	21.7 / POS
